# Supplementary material for: Psychometric validation of the Perceived Stress Scale (PSS-10) among family caregivers of people with schizophrenia in China
Source: PubMed Central journal article supplement — BMJ Open. 2023 Nov 30;13(11):e076372. doi: 10.1136/bmjopen-2023-076372 (PMC10689371; doi:10.1136/bmjopen-2023-076372), 2023-11-30
Supplement: bmjopen-2023-076372.draft_revisions.pdf [file bmjopen-2023-076372.draft_revisions.pdf]

# BMJ Open

BMJ Open is committed to open peer review. As part of this commitment we make the peer review history of every article we publish publicly available.

When an article is published we post the peer reviewers' comments and the authors' responses online. We also post the versions of the paper that were used during peer review. These are the versions that the peer review comments apply to.

The versions of the paper that follow are the versions that were submitted during the peer review process. They are not the versions of record or the final published versions. They should not be cited or distributed as the published version of this manuscript.

BMJ Open is an open access journal and the full, final, typeset and author-corrected version of record of the manuscript is available on our site with no access controls, subscription charges or pay-per-view fees (<http://bmjopen.bmj.com>).

If you have any questions on BMJ Open's open peer review process please email [info.bmjopen@bmj.com](mailto:info.bmjopen@bmj.com)

# BMJ Open

## Psychometric validation of the Perceived Stress Scale (PSS-10) among family caregivers of persons with schizophrenia in China

|                               |                                                                                                                                                                                                                                                                                                                                                                                                                                                                                                                                                                                                                |
|-------------------------------|----------------------------------------------------------------------------------------------------------------------------------------------------------------------------------------------------------------------------------------------------------------------------------------------------------------------------------------------------------------------------------------------------------------------------------------------------------------------------------------------------------------------------------------------------------------------------------------------------------------|
| Journal:                      | <i>BMJ Open</i>                                                                                                                                                                                                                                                                                                                                                                                                                                                                                                                                                                                                |
| Manuscript ID                 | bmjopen-2023-076372                                                                                                                                                                                                                                                                                                                                                                                                                                                                                                                                                                                            |
| Article Type:                 | Original research                                                                                                                                                                                                                                                                                                                                                                                                                                                                                                                                                                                              |
| Date Submitted by the Author: | 06-Jun-2023                                                                                                                                                                                                                                                                                                                                                                                                                                                                                                                                                                                                    |
| Complete List of Authors:     | Tao, Xiao ; Central South University Third Xiangya Hospital<br>Zhu, Feng ; Central South University Xiangya School of Public Health<br>Wang, Dan ; Central South University Xiangya School of Public Health<br>Liu, Xiang ; Central South University Xiangya School of Public Health<br>Xi, Shi-jun; Central South University Xiangya School of Public Health, Department of Social Medicine and Health Management; Foshan Center for Disease Control and Prevention<br>YU, YU; Xiangya Hospital Central South University, ; Yale University School of Medicine, Division of Prevention and Community Research |
| Keywords:                     | Psychometrics, PSYCHIATRY, Schizophrenia & psychotic disorders < PSYCHIATRY, Nursing Care                                                                                                                                                                                                                                                                                                                                                                                                                                                                                                                      |
|                               |                                                                                                                                                                                                                                                                                                                                                                                                                                                                                                                                                                                                                |

SCHOLARONE™  
Manuscripts

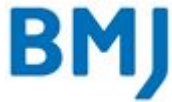

I, the Submitting Author has the right to grant and does grant on behalf of all authors of the Work (as defined in the below author licence), an exclusive licence and/or a non-exclusive licence for contributions from authors who are: i) UK Crown employees; ii) where BMJ has agreed a CC-BY licence shall apply, and/or iii) in accordance with the terms applicable for US Federal Government officers or employees acting as part of their official duties; on a worldwide, perpetual, irrevocable, royalty-free basis to BMJ Publishing Group Ltd ("BMJ") its licensees and where the relevant Journal is co-owned by BMJ to the co-owners of the Journal, to publish the Work in this journal and any other BMJ products and to exploit all rights, as set out in our [licence](#).

The Submitting Author accepts and understands that any supply made under these terms is made by BMJ to the Submitting Author unless you are acting as an employee on behalf of your employer or a postgraduate student of an affiliated institution which is paying any applicable article publishing charge ("APC") for Open Access articles. Where the Submitting Author wishes to make the Work available on an Open Access basis (and intends to pay the relevant APC), the terms of reuse of such Open Access shall be governed by a Creative Commons licence – details of these licences and which [Creative Commons](#) licence will apply to this Work are set out in our licence referred to above.

Other than as permitted in any relevant BMJ Author's Self Archiving Policies, I confirm this Work has not been accepted for publication elsewhere, is not being considered for publication elsewhere and does not duplicate material already published. I confirm all authors consent to publication of this Work and authorise the granting of this licence.

## Title Page

**Title:** Psychometric validation of the Perceived Stress Scale (PSS-10) among family caregivers of persons with schizophrenia in China

### Authors

**Xiao Tao (XT)**

**Degree:** Master degree

**Affiliation:** Nursing Department, The Third Xiangya Hospital, Central South University, Changsha, Hunan, China.

**Address:** 138 Tongzipo Road, Yuelu District Changsha, Hunan, China 410013

**Email:** 1823308475@qq.com

**Tel:** +86-(0)731-88618627

**Feng Zhu (FZ)**

**Degree:** Master

**Affiliation:** Department of Social Medicine and Health Management, Xiangya School of Public Health, Central South University

**Address:** Upper Mayuanlin Road 238, Changsha, Hunan 410008, China

**E-mail:** [zhufengastrid0403@163.com](mailto:zhufengastrid0403@163.com)

**Dan Wang (DW)**

**Degree:** Master

**Affiliation:** Department of Social Medicine and Health Management, Xiangya School of Public Health, Central South University

1  
2  
3  
4 **Address:** Upper Mayuanlin Road 238, Changsha, Hunan 410008, China  
5

6 **E-mail:** [wangdan1716@163.com](mailto:wangdan1716@163.com)  
7  
8  
9

10  
11  
12 **Xiang Liu (XL)**  
13

14 **Degree:** Master  
15

16  
17 **Affiliation:** Department of Social Medicine and Health Management, Xiangya School  
18  
19 of Public Health, Central South University  
20

21  
22 **Address:** Upper Mayuanlin Road 238, Changsha, Hunan 410008, China  
23

24 **E-mail:** 634473729@qq.com  
25  
26  
27  
28  
29

30 **Shi-jun Xi (SJX) \* (corresponding author)**  
31

32 **Degree:** Master  
33

34  
35 **Affiliation:** Department of Social Medicine and Health Management, Xiangya School  
36  
37 of Public Health, Central South University; Foshan Center for Disease Control and  
38  
39 Prevention  
40

41  
42 **Address:** Upper Mayuanlin Road 238, Changsha, Hunan 410008, China; Yingyin Road  
43  
44 3 , Chancheng District, Foshan 528000, China  
45

46 **E-mail:** 2324411296@qq.com; xishijun111@163.com  
47  
48  
49  
50  
51

52  
53 **Yu Yu (YY)**  
54

55 **Degree:** PhD  
56

57  
58 **Affiliation:** Department of Social Medicine and Health Management, Xiangya School  
59  
60

1  
2  
3  
4 of Public Health, Central South University; Division of Prevention and Community

5  
6  
7 Research, Department of Psychiatry, Yale School of Medicine

8  
9 **Address:** Upper Mayuanlin Road 238, Changsha, Hunan 410008, China; 389 Whitney

10  
11  
12 Avenue, New Haven, CT 06511, USA

13  
14 **Email:** [yuyu2016@csu.edu](mailto:yuyu2016@csu.edu); [yu.yu@yale.edu](mailto:yu.yu@yale.edu)

15  
16  
17 **Tel:** +86-(0)731-84805459; 203-745-9531

## Abstract

**Background:** The 10-item Perceived Stress Scale (PSS-10) is a widely used measure of perceived stress that has been validated in various populations. The present study examines the reliability and validity of the PSS-10 in a population not previously examined: Chinese family caregivers of persons with schizophrenia.

**Methods:** A sample of 449 family caregivers of persons with schizophrenia were recruited for psychometric testing of the scale. Internal consistency was tested by calculating Cronbach's  $\alpha$ , and test-retest reliability using the intraclass correlation coefficient (ICC). Factor structure was tested using confirmatory factor analysis (CFA), and concurrent validity was examined by investigating the correlation of the PSS-10 to relevant convergent and discriminant measures, including stigma, depression, anxiety, social support, family functioning and caregiving rewarding feelings.

**Results:** The PSS-10 showed good internal consistency and test-retest reliability, with Cronbach's alpha of 0.79 and ICC of 0.91, respectively. CFA corroborated its priori two-factor structure. In addition, the PSS-10 was correlated in the expected direction with all indicators examined; that is, positively correlated with stigma ( $r=0.16$ ,  $p<0.01$ ), depression ( $r=0.54$ ,  $p<0.01$ ), and anxiety ( $r=0.62$ ,  $p<0.01$ ), and negatively correlated with social support ( $r=-0.22$ ,  $p<0.01$ ), family functioning ( $r=-0.30$ ,  $p<0.01$ ), and caregiving rewarding feelings ( $r=-0.33$ ,  $p<0.01$ ), indicating strong concurrent validity.

**Conclusion:** The findings indicate that the PSS-10 can be used to measure perceived stress in future research and practice with this and related populations.

**Keywords:** Perceived Stress Scale; psychometric testing; reliability, validity,

## Confirmatory Factor Analysis

### **Strengths and limitations of this study**

1. This study validated the Chinese version of PSS-10 among family caregivers of persons with schizophrenia. Its psychometric properties among family caregivers of individuals with prolonged illnesses, such as with schizophrenia, has not been examined in Chinese communities before.
2. High test–retest reliability was supported by high ICC of the total score, also showing the stability of PSS-10 in assessing perceived stress over time.
3. The sample were recruited from 12 urban communities of Changsha city and thus may not representative of other areas, especially rural communities.
4. The cross-sectional design of the study may preclude testing of sensitivity to change for the PSS-10.



# Psychometric validation of the Perceived Stress Scale (PSS-10) among family caregivers of persons with schizophrenia in China

## Introduction

Schizophrenia is a severe, debilitating chronic psychiatric disorder that causes impairments in cognition, speech, thinking and emotional responsiveness.[1] It impairs individuals' ability to carry out daily activities, including social and occupational functioning [2]. For instance, Wiersma et al. (2000) conducted a 15-year multicenter survey in Europe and found that social dysfunction is widespread and persistent in schizophrenia [3]. Similar findings were also reported in China[4]. Consequently, people with schizophrenia often require ongoing support and care, which in many Asian countries, is often provided by family members [5]. In China, efforts have been made to establish community-based rehabilitation services for individuals with schizophrenia but with family members assuming the major role of caregiving [6]. Caring for people with schizophrenia can be a demanding activity that challenges the physical and mental health of family caregivers [7]. As a result, family caregivers may report a high level of stress, which can lead to negative health outcomes and reduced quality of life [8].

Studies have shown that the stress experienced by family caregivers of people with schizophrenia is higher than for caregivers of people with other prolonged illnesses, which is related to higher psychological distress, depression, and anxiety [9, 10]. Caregivers' stress may also result in conflict among family members and increased family dysfunction [7, 11]. These caregivers also report increased perceived stigma due

1  
2  
3  
4 to their loved one's mental illness [12-14] as well as insufficient social support [12].  
5  
6 For example, family caregivers may report shame due to disruptive public behaviors of  
7  
8 the family member with schizophrenia and seek to hide them from the public as much  
9  
10 as possible [15, 16]. This can result in social isolation, lack of social support, and social  
11  
12 exclusion, which may result in increased stress. Thus, it is critical that the perceived  
13  
14 stress of family caregivers of persons with schizophrenia be assessed using reliable and  
15  
16 valid measures.  
17  
18  
19  
20  
21

22 The perceived stress scale (PSS) is one of the most widely used measure for assessing  
23  
24 perceived stress in the world [17, 18]. The PSS [17], measures the degree to which  
25  
26 participants perceive unpredictability, lack of control, or overload in their lives [19]. The  
27  
28 original PSS included 14 items (PSS-14), which were further abbreviated into two short  
29  
30 versions: PSS-10 and PSS-4 [17, 19]. Although the original PSS-14 showed sufficient  
31  
32 validity and reliability, the shorter version (PSS-10) has superior psychometric  
33  
34 properties and is recommended for research [20]. The PSS-10 has been translated into  
35  
36 various languages and validated in various countries, such as Sweden [21], France [22],  
37  
38 Korea [23], Mexico [24], the United States [25], Arabia [26], Serbia [27], Germany [28],  
39  
40 Viet Nam [29], Brazil [30] and Thailand [31]. The PSS -10 was first translated into  
41  
42 Simplified Chinese (the language of the Chinese mainland) by Yang and Huang in 2003  
43  
44 [32], and approved by its original developer Dr. Cohen [33]. The Simplified Chinese  
45  
46 version of the PSS-10 (C-PSS-10) has been used with including university students [34],  
47  
48 elderly service workers [35] and cardiac patients [36], but its psychometric properties  
49  
50 among family caregivers of individuals with prolonged illnesses, such as with  
51  
52  
53  
54  
55  
56  
57  
58  
59  
60

1  
2  
3  
4 schizophrenia, has not been examined in Chinese communities.  
5

6 The current study was thus conducted to validate the PSS-10 among a Chinese  
7  
8 community sample of family caregivers of people living with schizophrenia.  
9  
10 Specifically, we examine psychometric properties of PSS-10 for internal consistency  
11  
12 reliability, test-retest reliability, factor structure and concurrent validity.  
13  
14  
15  
16  
17  
18

## 19 **Materials and methods**

### 20 **Participants and procedure**

21  
22 This cross-sectional study used baseline data from a large community sample who  
23  
24 agreed to participate in an intervention to support family caregivers of persons with  
25  
26 schizophrenia [37]. A total of 449 family caregivers of people with schizophrenia were  
27  
28 recruited from 12 communities affiliated with the Changsha Psychiatric Hospital  
29  
30 through the "686 program". "686 program" is China's largest demonstration project  
31  
32 aimed at integrating hospital and community services for serious mental illness [38].  
33  
34 The Changsha Psychiatric Hospital has long provided mental health services to the 12  
35  
36 communities, including free antipsychotic medicine delivery. Every month, a medical  
37  
38 team from the Changsha Psychiatric Hospital went to each community health center to  
39  
40 distribute free medicine and run routine health check-ups for registered clients with  
41  
42 serious mental illness. Inclusion criteria of family caregivers are: 1) caring for a family  
43  
44 member registered in the "686 program" and satisfied the Chinese classification of  
45  
46 Mental Disorders (CCMD-3) or the international classification of Schizophrenia (ICD-  
47  
48 10) criteria for schizophrenia ; 2) living with the care recipient for at least the last two  
49  
50  
51  
52  
53  
54  
55  
56  
57  
58  
59  
60

1  
2  
3  
4 years; 3) aged  $\geq 18$  years; 4) able to read and communicate and complete the  
5  
6 questionnaire. Exclusion criteria include: 1) care recipient not registered in the 686  
7  
8 program; 2) care recipient diagnosed with a mental illness other than schizophrenia,  
9  
10 such as depression and epilepsy; 3) care recipient living alone; 4) family caregiver has  
11  
12 a serious physical or mental illness and thus unable to communicate and complete the  
13  
14 interview; 5) family caregiver younger than 18 years. Our final sample size was 449  
15  
16 participants, satisfying the sample size requirement of at least 10 participants for each  
17  
18 item in psychometric testing of scales [39].  
19  
20  
21  
22  
23  
24

25 Data collection was conducted from May 2019 and September 2019. Family  
26  
27 caregivers were approached during the free medicine delivery process by the medical  
28  
29 team and invited to participate in the study. The medical team explained in detail about  
30  
31 the study and referred interested caregivers to our research team. The research team  
32  
33 fully explained the research to each family caregiver and fully informed the benefits  
34  
35 and risk of participation, as well as their right to withdraw at any time. After providing  
36  
37 written informed consent, the caregivers received face-to-face interviews conducted by  
38  
39 our research team, and completed a battery of questionnaires. The entire interview  
40  
41 required 20-40 minutes, and each participant were reimbursed with RMB 20 yuan (USD  
42  
43 \$2.80) for completion of the questionnaire.  
44  
45  
46  
47  
48  
49  
50  
51  
52

## 53 Instruments

### 54 Perceived stress scale (PSS-10)

55  
56 The 10-item perceived stress scale (PSS-10) is a self-assessed measure of  
57  
58  
59  
60

1  
2  
3  
4 psychological stress experienced over the past 30 days. Each answer is scored on a  
5  
6 Likert-type scale of 5, ranging from 0 (never) to 4 (very often) .The scale included two  
7  
8 factors [40, 41] [42]: “perceived helplessness” consists of 6 negative items (item  
9  
10 1,2,3,6,9,10) assessing the degree of lack of control and negative reactions; “perceived  
11  
12 self-efficacy” consists of 4 positive items (item 4,5,7, 8) assessing one’s ability to cope  
13  
14 with existing stressors [19, 36, 43]. which were reverse coded so that higher score  
15  
16 indicating higher stress. The total score of PSS-10 ranges from 0 to 40, with higher  
17  
18 scores indicating greater perceived stress and scores of 10 or more indicating moderate  
19  
20 to high perceived stress [44]. The Chinese version of PSS-10 used in the present study  
21  
22 showed satisfactory internal consistency, with a Cronbach's  $\alpha$  of 0.79.  
23  
24  
25  
26  
27  
28  
29

### 30 **Perceived Devaluation and Discrimination Scale (PDD)**

31  
32 The 12-item Perceived Devaluation and Discrimination Scale (PDD), originated  
33  
34 from the Link disease stigma scale series, is a widely used scale for measuring  
35  
36 perceived stigma [45-47]. The PDD includes two factors: devaluation (5 items) and  
37  
38 discrimination (7items). Each item is scored on a Likert-type scale of 5, ranging from  
39  
40 1 (fully agree) to 5 (totally disagree). Items 1, 2, 3, 4, 8 and 10 were reverse-coded. The  
41  
42 total score ranges from 12 to 60, with higher score indicating higher level of perceived  
43  
44 stigma [48]. The PDD showed good reliability with a Cronbach’s alpha of 0.78 in the  
45  
46 original study[45]. The Chinese version of PDD also showed good reliability in other  
47  
48 studies[49]. In the current study, the PDD showed acceptable internal consistency with  
49  
50 a Cronbach's alpha of 0.70.  
51  
52  
53  
54  
55  
56  
57

### 58 **Patient health questionnaire (PHQ-9)**

1  
2  
3  
4 The 9-item Patient Health Questionnaire (PHQ-9) is one of the most widely used  
5  
6 screening tools for assessing depressive symptoms over the previous two weeks [50].  
7  
8 Each item is scored on a Likert-type scale of 4, ranging from 0 (not at all) to 3 (nearly  
9  
10 every day). The total score ranges from 0 to 27, with higher score indicating more  
11  
12 severe depressive symptoms and a cutoff value of 10 distinguishing depression from its  
13  
14 absence. The PHQ-9 was first translated into Chinese by Yeung et al. in 2008, and  
15  
16 showed good reliability and validity in the Chinese population [51]. The Chinese  
17  
18 version of PHQ-9 shows good internal consistency in the current study, with a  
19  
20 Cronbach's Coefficient of 0.93.  
21  
22  
23  
24  
25  
26

### 27 **Generalized anxiety disorder scale (GAD-7)**

28  
29  
30 The 7-item Generalized Anxiety Disorder scale (GAD-7) is one of the most widely  
31  
32 used screening tools for assessing anxiety symptoms during the previous two weeks  
33  
34 [52]. Each item is scored on a Likert-type scale of 4, ranging from 0 (not at all) to 3  
35  
36 (nearly every day). The total score ranges from 0 to 21, with higher score indicating  
37  
38 more severe anxiety symptoms and a cutoff value of 10 distinguishing anxiety and non-  
39  
40 anxiety [53]. The GAD-7 was first translated into Chinese by He X et  
41  
42 al. [54], and showed good reliability and validity in the Chinese population [55]. The  
43  
44 Chinese version of GAD-7 showed good internal consistency in the current study, with  
45  
46 a Cronbach's Coefficient of 0.95.  
47  
48  
49  
50  
51  
52

### 53 **Multidimensional scale of perceived social support (MSPSS)**

54  
55  
56 The 12-item perceived social support multidimensional scale (MSPSS) is a widely  
57  
58 used scale to measure the strength of support respondents received from three different  
59  
60

1  
2  
3  
4 sources: family, friends and significant others [56]. Each item is scored on a Likert-  
5  
6 type scale of 7, ranging from 1 (very strongly disagree) to 7 (very strongly agree). The  
7  
8 total score ranges from 12 to 84, with higher score indicating higher social support [56,  
9  
10 57]. The MSPSS was first translated into Chinese by Huang L et al in 1996[58]. It  
11  
12 showed good reliability with a Cronbach's alpha of 0.85-0.91 in the original study [57].  
13  
14 The Chinese version of MSPSS in the current study showed good internal consistency  
15  
16 with a Cronbach's Coefficient of 0.95.  
17  
18  
19  
20  
21

### 22 **Family adaptation, partnership, growth, affection and resolve index scale** 23 24 **(APGAR)** 25

26  
27 The 5-item Family adaptation, partnership, growth, affection and resolve index scale  
28  
29 (APGAR) is a widely used scale to measure one's satisfaction with their family  
30  
31 functionality. Each item is scored on a Likert-type scale of 3, ranging from 0 (almost  
32  
33 never) to 2 (almost always) [59]. The total score ranges from 0 to 10, with higher score  
34  
35 indicating higher satisfaction with family functioning. The APGAR has been widely  
36  
37 used and well validated in many previous studies, with Cronbach  $\alpha$  of 0.86 in the initial  
38  
39 rating [60-62]. The Chinese version of APGAR in the current study showed good  
40  
41 internal consistency with a Cronbach's Coefficient of 0.95.  
42  
43  
44  
45  
46  
47

### 48 **Caregiving rewarding feelings (CRF)** 49

50  
51 The 12-item caregiving rewarding feelings (CRF) measures positive emotions of  
52  
53 caregivers during care of a family member with schizophrenia. CRF was initially  
54  
55 developed based on qualitative interviews with 30 primary caregivers of people with  
56  
57 schizophrenia, then validated in a larger sample. The development and validation of the  
58  
59  
60

1  
2  
3  
4 CRF have been described elsewhere [63]. Some sample items include whether caring  
5  
6 for a family member with schizophrenia makes them become "more loving and patient"  
7  
8 "gain a lot of respect " "more active and optimistic, " "more responsible". Each item is  
9  
10 scored on a Likert-type scale of 5, ranging from 1 "totally disagree" to 5 "strongly  
11  
12 agree". The total score ranges from 0 to 36, with higher score indicating more positive  
13  
14 feelings. The CRF in the current study showed good reliability with a Cronbach's alpha  
15  
16 of 0.96.  
17  
18  
19  
20  
21  
22  
23  
24

### 25 **Statistical analyses**

26  
27 Amos 22.0 (SPSS Inc., Chicago, IL, USA) and IBM SPSS statistics 23 (IBM,  
28  
29 Armonk, New York, America) were used for statistical analyses. The  
30  
31 sociodemographic characteristics of the samples were examined using descriptive  
32  
33 statistics, including mean and standard deviation (SD) for continuous variables,  
34  
35 frequency and percentage for categorical variables.  
36  
37  
38  
39

40  
41 Internal consistency reliability was assessed using Cronbach  $\alpha$  for the total scale of  
42  
43 PSS-10 and its two subscales. A Cronbach  $\alpha$  level of  $\geq 0.70$  indicates good reliability  
44  
45 [64]. Test-retest reliability was calculated in a subsample of these participants (n =25)  
46  
47 who were randomly assessed again 2 weeks later to allow calculation of the intraclass  
48  
49 correlation coefficient (ICC). An ICC value of  $\geq 0.75$  indicates good test-retest  
50  
51 reliability[65, 66].  
52  
53  
54

55  
56 Factor structure was evaluated by Confirmatory factor analysis (CFA) to test the a  
57  
58 priori two-factor structure for the PSS-10. Kline (2005) and Byrne (2001) suggested  
59  
60



1  
2  
3  
4 the following CFA goodness-of-fit measures for model fit evaluation: goodness-of-fit  
5  
6 index (GFI) >0.9, adjust goodness-of-fit index(AGFI)>0.9, comparing fit index  
7  
8 (CFI)>0.9, non-normal fit index (NNFI)>0.90, standard root mean square residual  
9  
10 (SRMR)<0.08, root mean square error of approximate (RMSEA)<0.08, Tucker-Lewis  
11  
12 Index (TLI)>0.9 [67-69].  
13  
14  
15

16  
17 Concurrent validity was assessed using Pearson product–moment correlations with  
18  
19 an expected significant positive correlation with the PDD, PHQ-9, and GAD-7; and  
20  
21 expected significant negative correlations with the MSPSS, APGAR, and CRF.  
22  
23  
24  
25  
26

## 27 **Results**

### 28 **Sample demographics**

29  
30 Table 1 shows the socio-demographic characteristics of the sample. The caregivers  
31  
32 had a mean (SD) age of 60.90 (12.28) years. Most caregivers were spouses or parents  
33  
34 (80.18%), not employed (85.6%), of middle and high school education (61.5%), and  
35  
36 married/cohabited (75.7%). Over half were female (54.1%), and had an annual income  
37  
38 of lower than 20,000 RMB (56.6%).  
39  
40  
41  
42  
43  
44

### 45 **Reliability**

46  
47 Internal consistency reliability, as measured by Cronbach's alpha coefficient, was  
48  
49 0.79 for the total score of the PSS-10, 0.88 for the subscale of perceived helplessness,  
50  
51 and 0.79 for the subscale of perceived self-efficacy. These results indicate good internal  
52  
53 consistency reliability. The ICC for the total score was 0.91 ( $p < 0.001$ ), exceeding the  
54  
55 recommended standard of 0.70 and indicating good test-retest reliability.  
56  
57  
58  
59  
60

## Factor structure

Confirmatory factor analysis (CFA) was used to test the a priori two-factor structure of PSS-10. The two-factor structure was supported by the following goodness-of-fit statistics:

$\chi^2 / df = 2.628 < 3$ ,  $p < 0.001$ ; GFI=0.963; AGFI=0.937; CFI=0.972; NNFI=0.961; TLI=0.961; RMSEA=0.061; SRMR=0.061. All these indexes indicated good or acceptable model fit. Figure 1 shows visualization of the two-factor model. Table 2 displays the means, standard deviations, and factor loadings of all 10 items. All items loaded well in their respective domains, with factoring loading ranging from 0.61-0.83 for subscale of perceived helplessness, and 0.60-0.83 for the subscale of perceived self-efficacy. The correlation between the two scales of PSS-10 was 0.006 ( $p < 0.001$ ).

## Concurrent validity

The concurrent validity of PSS-10 was verified using correlational analysis. As shown in Table 3, the total score of the PSS-10 and its two subscales were positively correlated with PDD ( $r: 0.07$  to  $0.16$ ), PHQ-9 ( $r: 0.17$  to  $0.54$ ), and GAD-7 ( $r: 0.14$  to  $0.62$ ). The scores of PSS-10 and its two subscales were significantly negatively correlated with MSPSS-12 ( $r: -0.24$  to  $-0.13$ ), APGAR-5 ( $r: -0.35$  to  $-0.19$ ), and CRF-12 ( $r: -0.45$  to  $-0.33$ ). All the correlation coefficients were significant at  $p = 0.01$ , which confirmed the concurrent validity of PSS-10.

## Discussion

1  
2  
3  
4 PSS-10 is one of the most widely used scales for stress assessment and has been  
5  
6 translated into more than 20 languages [20]. This study validated the Chinese version  
7  
8 of PSS-10 among family caregivers of persons with schizophrenia. Overall, the PSS-  
9  
10 10 showed good internal consistency and test–retest reliability, and confirmatory factor  
11  
12 analysis supported the a priori two-factor structure with favorable model fit indices.  
13  
14 Concurrent validity was also supported by significant positive correlations with stigma,  
15  
16 depression, and anxiety, and significant negative relationships with social support,  
17  
18 family functioning, and caregiving rewarding feelings. Thus, the PSS-10 demonstrated  
19  
20 psychometrically sound properties for assessing the subjective experience of stress  
21  
22 among caregivers of people with schizophrenia.  
23  
24  
25  
26  
27  
28  
29

30 The Cronbach  $\alpha$  value for the total scale and two subscales of PSS-10 exceeded the  
31  
32 recommended 0.70, indicating high internal consistency reliability. This finding is  
33  
34 consistent with previous studies of Chinese [33-35] and non-Chinese samples, such as  
35  
36 Japan [70], South Korea [71], the United States [72], and Sweden [21]. High test–retest  
37  
38 reliability was supported by high ICC of the total score, also showing the stability of  
39  
40 PSS-10 in assessing perceived stress over time. However, test–retest reliability findings  
41  
42 must be interpreted with caution because of the relatively small sample size. Future  
43  
44 research may benefit from using a larger sample size to examine test–retest reliability.  
45  
46  
47  
48  
49

50 Confirmatory factor analysis validated the a priori two-factor structure of PSS-10:  
51  
52 perceived helplessness and perceived self-efficacy. Perceived helplessness includes 6  
53  
54 negative phrasing items (item 1,2,3,6,9,10) that reflect a lack of control and negative  
55  
56 emotions, while perceived self-efficacy includes 4 positive phrasing items (item 4,5,7,  
57  
58  
59  
60

1  
2  
3  
4 8) that reflect confidence in dealing with things and positive emotions. The favorable  
5  
6 model fit indices show the two-factor structure is good and the fit acceptable. Also, in  
7  
8  
9 line with our theoretical hypothesis, all items of PSS-10 had high factor loadings on its  
10  
11 specified factors, further showing the robustness of two-factor structure of the PSS-10.  
12  
13  
14 The two-factor structure found in the current sample is consistent with previous  
15  
16 research on the use of PSS-10 in other populations, such as university students [34, 52,  
17  
18 73], general adult samples [33, 35, 74-76], and clinical patients [36, 40]. What is  
19  
20 noteworthy is that there has been wide debate about whether PSS-10 should be used as  
21  
22 a full scale [19, 30, 33], or two separate subscales. Some researchers believe that the  
23  
24 two subscales measure different components of the stress experience [76] and have  
25  
26 suggested using them separately [77]. In the current study, the low correlation  
27  
28 coefficient of 0.09 between the two subscales implies that the two factors may be  
29  
30 unrelated and reflect different domains of perceived stress, which is consistent with the  
31  
32 original developer-Cohen's conceptualization of the scale (1988). It seems that the PSS-  
33  
34 10 can be used either as a whole scale or as two subscales depending on the research  
35  
36 questions under study.  
37  
38  
39  
40  
41  
42  
43  
44  
45  
46

47 The concurrent validity of PSS-10 was demonstrated by its significant positive  
48  
49 correlations with PDD, PHQ-9, and GAD-7, as well as significant negative correlations  
50  
51 with MSPSS12, APGAR, and CRF. This finding is consistent with previous studies  
52  
53 showing a negative health outcomes related to high perceived stress among caregivers  
54  
55 of people with schizophrenia, such as increased depression and anxiety, decreased  
56  
57  
58  
59  
60

1  
2  
3  
4 family functioning and rewarding feelings, which may be related to their increased  
5  
6 feelings of stigma and reduced social support [10, 12, 25] Understanding the  
7  
8 relationship between perceived stress and health outcomes of family caregivers may  
9  
10 guide further family caregiver interventions.  
11  
12  
13  
14

15 The present study also had several limitations. First, the sample were recruited from  
16  
17 12 urban communities of Changsha city and thus may not representative of other areas,  
18  
19 especially rural communities. Future multi-center studies may address this issue.  
20  
21 Second, the cross-sectional design of the study may preclude testing of sensitivity to  
22  
23 change for the PSS-10; subsequent longitudinal research should examine this. Third,  
24  
25 test-retest reliability was based on a relatively small sample size, which may be further  
26  
27 confirmed in a larger sample.  
28  
29  
30  
31  
32  
33  
34  
35  
36  
37

## 38 **Conclusion**

39  
40  
41  
42 In summary, the PSS-10 has good psychometric characteristics assessing the  
43  
44 perceived stress of family caregivers of people living with schizophrenia, including  
45  
46 good internal consistency, test-retest reliability, and concurrent validity. Confirmatory  
47  
48 factor analysis confirmed the a priori two-factor structure: perceived helplessness and  
49  
50 perceived self-efficacy in the current population. Our findings provide reliable evidence  
51  
52 for the use of PSS-10 in future studies to assess perceived stress among caregivers of  
53  
54 people living with schizophrenia, and potentially, other caregiving samples.  
55  
56  
57  
58  
59  
60

## Acknowledgements

This work was funded by a grant from the National Natural Science Foundation of China (Grant Number 71804197) and the China Scholarship Council (CSC). The authors would like to thank all the families of the persons with schizophrenia for their participation in the WIFI program and for openly sharing their feelings and experiences. We also thank the Changsha Psychiatric Hospital as well as the 12 community health centers for their collaboration and support.

## Competing interests

The authors declare that they have no competing interests.

## Authors' contributions:

All authors have made substantial contributions to the study conception and design, data collection and analysis, as well as to the development and editing of the manuscript. XT, SJX and YY contributed to the conception and design of the study, XT, SJX, FZ, DW, XL and YY contributed to the research conduction and data collection, XT, SJX and FZ contributed to data analyses, DW, XL, XT, SJX and YY contributed to data interpretation. XT and SJX drafted the article while XT, XSJ, FZ, DW, XL and YY critically appraised it and revised it. All authors approved the final version of manuscript for submission and publication and agreed to be accountable for all aspects

1  
2  
3  
4 of the work.  
5  
6  
7  
8

### 9 **Ethics approval and consent to participate**

10  
11 The Institutional review board of Xiangya School of Public Health Central South  
12 University (No.: XYGW-2019-029) has approved and regulates the ethical execution  
13  
14  
15  
16  
17 of this research.  
18  
19  
20  
21

### 22 **Availability of Data and Materials**

23  
24 The datasets used and/or analyzed during the current study are available from the  
25  
26  
27 corresponding author on reasonable request.  
28  
29  
30  
31

### 32 **Consent for publication**

33  
34  
35 Not applicable.  
36  
37  
38  
39

### 40 **References**

- 41  
42  
43  
44 1. Dr. Benjamin J. Sadock VAS: *Kaplan and Sadock's Synopsis of Psychiatry: Behavioral*  
45  
46 *Sciences/Clinical Psychiatry*. LWW; Eleventh; 2014.  
47  
48  
49 2. Sakakibara E: **What is mental illness?** *BMJ* 2017.  
50  
51  
52 3. Wiersma D, Wanderling J, Dragomirecka E, Ganev K, Harrison G, Der Heiden WA,  
53  
54 Nienhuis FJ, Walsh D: **Social disability in schizophrenia: its development and prediction**  
55  
56 **over 15 years in incidence cohorts in six European centres.** *Psychological Medicine*  
57  
58  
59  
60

- 2000, **30**:1155-1167.
4. Jiang ZN: *Modern Psychiatry*. Beijing: Science Press; 1999.
  5. Hsiao C-Y, Tsai Y-F: **Factors of caregiver burden and family functioning among Taiwanese family caregivers living with schizophrenia.** *Journal of clinical nursing* 2015, **24**:1546-1556.
  6. Huang Y: **Current situation and challenges of mental health in China.** *China health policy research* 2011, **9**:5-9.
  7. Suro G, Mamani WD: **Burden, interdependence, ethnicity, and mental health in caregivers of patients with schizophrenia.** *Family Process* 2013, **52**.
  8. Kizilirmak B, Kucuk L: **Care Burden Level and Mental Health Condition of the Families of Individuals With Mental Disorders.** *Archives of Psychiatric Nursing* 2016, **30**:47-54.
  9. Ampalam P, Gunturu S, Padma V: **A comparative study of caregiver burden in psychiatric illness and chronic medical illness.** *Indian journal of psychiatry* 2012, **54**:239-243.
  10. Chen QN, Liu L, Zhang D, Jun LI, Ya-Min LIJJoCP: **Impact of Social Support on Quality of Life and Rehabilitation in Patients with Schizophrenia.** 2016.
  11. Friedmann MS, McDermut WH, Solomon DA, Ryan CE, Keitner GI, Miller IW: **Family Functioning and Mental Illness: A Comparison of Psychiatric and Nonclinical Families.** *Family Process* 1997, **36**:357-367.
  12. Corrigan PW, Morris SB, Michaels PJ, Rafacz JD, Rusch N: **Challenging the Public Stigma of Mental Illness: A Meta-Analysis of Outcome Studies.** *Psychiatric Services* 2012, **63**:963-973.



- 1  
2  
3  
4 13. Sharac J, Mccrone P, Clement S, Thornicroft G: **JEEPS: The economic impact of mental**  
5  
6 **health stigma and discrimination: a systematic review.** 2010, **19**:223-232.  
7  
8  
9 14. Weimand BM, Hedelin B, Silström C, Hall-Lord ML: **JMH: Burden and health in**  
10 **relatives of persons with severe mental illness: a Norwegian cross-sectional study.**  
11  
12  
13  
14  
15 2010, **31**:804.  
16  
17 15. Liang X, Guo Q, Luo J, Li F, Ding D, Zhao Q, Hong Z: **Anxiety and depression**  
18 **symptoms among caregivers of care-recipients with subjective cognitive decline and**  
19 **cognitive impairment.** *Bmc Neurology* 2016, **16**.  
20  
21  
22  
23  
24 16. Heflinger CA, Hinshaw SP, JAH, Health PiM, Research MHS: **Stigma in Child and**  
25 **Adolescent Mental Health Services Research: Understanding Professional and**  
26 **Institutional Stigmatization of Youth with Mental Health Problems and their Families.**  
27  
28  
29  
30  
31 2010, **37**:p.61-70.  
32  
33  
34  
35 17. Cohen S, Kamarck T, Mermelstein R: **A Global Measure of Perceived Stress.** *Journal*  
36 *of Health and Social Behavior* 1983, **24**:385.  
37  
38  
39  
40 18. Reis D, Lehr D, Heber E, Ebert DD: **The German Version of the Perceived Stress Scale**  
41 **(PSS-10): Evaluation of Dimensionality, Validity, and Measurement Invariance With**  
42 **Exploratory and Confirmatory Bifactor Modeling.** 2019, **26**:1246-1259.  
43  
44  
45  
46  
47 19. Cohen S, Williamson GM: **Perceived Stress in a Probability Sample of the United**  
48 **States.** In; 1988: 31-67  
49  
50  
51  
52  
53 20. Lee EH: **Review of the Psychometric Evidence of the Perceived Stress Scale.** *Asian*  
54 *Nurs Res* 2012, **6**:121-127.  
55  
56  
57  
58 21. Nordin M, Nordin S: **Psychometric evaluation and normative data of the Swedish**  
59  
60

- 1  
2  
3  
4 version of the 10-item perceived stress scale. *Scandinavian Journal of Psychology*  
5  
6 2013, **54**:502-507.  
7  
8  
9 22. Lesage FX, Berjot S, Deschamps F: **PSYCHOMETRIC PROPERTIES OF THE**  
10  
11 **FRENCH VERSIONS OF THE PERCEIVED STRESS SCALE.** *International Journal of*  
12  
13 *Occupational Medicine and Environmental Health* 2012, **25**:178-184.  
14  
15  
16 23. Kim H-J: **Reliability and Validity of the 4-Item Version of the Korean Perceived Stress**  
17  
18 **Scale.** *Research in Nursing & Health* 2016, **39**:472-479.  
19  
20  
21 24. Gonzalez-Ramirez MT, Rodriguez-Ayan MN, Hernandez RL: **The Perceived Stress**  
22  
23 **Scale (PSS): Normative Data and Factor Structure for a Large-Scale Sample in Mexico.**  
24  
25 *Spanish Journal of Psychology* 2013, **16**:9.  
26  
27  
28 25. Mitchell AM, Crane PA, Kim Y: **Perceived Stress in Survivors of Suicide: Psychometric**  
29  
30 **Properties of the Perceived Stress Scale.** *Research in Nursing & Health* 2008, **31**:576-  
31  
32 585.  
33  
34  
35 26. Chaaya M, Osman H, Naassan G, Mahfoud Z: **Validation of the Arabic version of the**  
36  
37 **Cohen perceived stress scale (PSS-10) among pregnant and postpartum women.** *BMC*  
38  
39 *Psychiatry* 2010, **10**:7.  
40  
41  
42 27. Jovanovic V, Gavrilov-Jerkovic V: **More than a (negative) feeling: Validity of the**  
43  
44 **Perceived Stress Scale in Serbian clinical and non-clinical samples.** *Psihologija* 2015,  
45  
46 **48**:5-18.  
47  
48  
49 28. Klein EM, Brahler E, Dreier M, Reinecke L, Muller KW, Schmutzer G, Wolfling K, Beutel  
50  
51 **ME: The German version of the Perceived Stress Scale - psychometric characteristics**  
52  
53 **in a representative German community sample.** *Bmc Psychiatry* 2016, **16**:10.  
54  
55  
56  
57  
58  
59  
60

- 1  
2  
3  
4 29. Dao-Tran TH, Anderson D, Seib C: **The Vietnamese version of the Perceived Stress**  
5  
6 **Scale (PSS-10): Translation equivalence and psychometric properties among older**  
7  
8 **women.** *Bmc Psychiatry* 2017, **17:7.**  
9  
10  
11 30. Reis RS, Hino AAF, Rodriguez-Anez CR: **Perceived Stress Scale Reliability and**  
12  
13 **Validity Study in Brazil.** *Journal of Health Psychology* 2010, **15:107-114.**  
14  
15  
16 31. Wongpakaran N, Wongpakaran T: **The Thai version of the PSS-10: An Investigation of**  
17  
18 **its psychometric properties.** *BioPsychoSocial medicine* 2010, **4:6.**  
19  
20  
21 32. Yang TZ, Huang HT: **[An epidemiological study on stress among urban residents in**  
22  
23 **social transition period].** *Chinese Journal of Epidemiology* 2003, **24:760.**  
24  
25  
26 33. Wang Z, Chen J, Boyd JE, Zhang HY, Jia XZ, Qiu JY, Xiao ZP: **Psychometric**  
27  
28 **Properties of the Chinese Version of the Perceived Stress Scale in Policewomen.** *Plos*  
29  
30 *One* 2011, **6:4.**  
31  
32  
33 34. Lu W, Bian Q, Wang W, Wu X, Wang Z, Zhao M: **Chinese version of the Perceived**  
34  
35 **Stress Scale-10: A psychometric study in Chinese university students.** *PLOS ONE*  
36  
37 2017, **12:e0189543.**  
38  
39  
40 35. Ng S-M: **Validation of the 10-item Chinese perceived stress scale in elderly service**  
41  
42 **workers: one-factor versus two-factor structure.** *BMC psychology* 2013, **1:9.**  
43  
44  
45 36. Leung DYP, Lam TH, Chan SSC: **Three versions of Perceived Stress Scale: validation**  
46  
47 **in a sample of Chinese cardiac patients who smoke.** *Bmc Public Health* 2010, **10:7.**  
48  
49  
50 37. Yu Y, Li T-X, Xi S-J, Li Y-L, Xiao X, Yang M, Ge X, Xiao S, Tebes J: **Assessing a**  
51  
52 **WeChat-based integrative family intervention (WIFI) for schizophrenia: protocol for a**  
53  
54 **stepped-wedge cluster randomized trial (Preprint).** *JMIR Research Protocols* 2020.  
55  
56  
57  
58  
59  
60

- 1  
2  
3  
4 38. Ma H: **Integration of hospital and community services-the '686 Project'-is a crucial**  
5  
6 **component in the reform of China's mental health services.** *Shanghai archives of*  
7  
8 *psychiatry* 2012, **24**:172-174.  
9  
10  
11 39. Mookink LB, De Vet HCW, Prinsen CAC, Patrick DL, Alonso J, Bouter LM, Terwee  
12  
13 CBJQoLR: **COSMIN Risk of Bias checklist for systematic reviews of Patient-Reported**  
14  
15 **Outcome Measures.** 2017.  
16  
17  
18 40. Golden-Kreutz DM, Browne MW, Frierson GM, Andersen BL: **Assessing stress in**  
19  
20 **cancer patients - A second-order factor analysis model for the perceived stress scale.**  
21  
22 *Assessment* 2004, **11**:216-223.  
23  
24  
25 41. Roberti JW, Harrington LN, Storch EA: **Further Psychometric Support for the 10-Item**  
26  
27 **Version of the Perceived Stress Scale.** 2006, **9**:135-147.  
28  
29  
30 42. Barbosa-Leiker C, Kostick M, Lei M, Mcpherson S, Roper V, Hoekstra T, Wright BJS,  
31  
32 Stress HJotlSftlo: **Measurement Invariance of the Perceived Stress Scale and Latent**  
33  
34 **Mean Differences across Gender and Time.** 2013, **29**:253-260.  
35  
36  
37 43. Eklund M, Backstrom M, Tuveesson H: **Psychometric properties and factor structure of**  
38  
39 **the Swedish version of the Perceived Stress Scale.** *Nordic Journal of Psychiatry* 2014,  
40  
41 **68**:494-499.  
42  
43  
44 44. Alharbi H, Alshehry A: **Perceived stress and coping strategies among ICU nurses in**  
45  
46 **government tertiary hospitals in Saudi Arabia: a cross-sectional study.** *Annals of Saudi*  
47  
48 *Medicine* 2019, **39**:48-55.  
49  
50  
51 45. Link BG, Cullen FT, Frank J, Wozniak JF: **The Social Rejection of Former Mental**  
52  
53 **Patients: Understanding Why Labels Matter.** *American Journal of Sociology* 1987,  
54  
55  
56  
57  
58  
59  
60

- 1  
2  
3  
4 92:1461-1500.  
5  
6  
7 46. Link BG, Struening EL, Neese-Todd S, Asmussen S, Phelan JC: **Stigma as a Barrier**  
8  
9 **to Recovery: The Consequences of Stigma for the Self-Esteem of People With Mental**  
10  
11 **Illnesses.** *Psychiatric Services* 2001, **52**:1621-1626.  
12  
13  
14 47. Perlick DA, Rosenheck RA, Clarkin JF, Sirey JA, Salah J, Struening EL, Link BG:  
15  
16 **Stigma as a Barrier to Recovery: Adverse Effects of Perceived Stigma on Social**  
17  
18 **Adaptation of Persons Diagnosed With Bipolar Affective Disorder.** *Psychiatric Services*  
19  
20 2001, **52**:1627-1632.  
21  
22  
23  
24 48. China NHCotpsRo: **Documents of the General Office of the Ministry of Health. Notice**  
25  
26 **of the General Office of the Ministry of Health of the People's Republic of China on the**  
27  
28 **printing and distribution of the investigation and evaluation program on mental health**  
29  
30 **indicators.** 2010.  
31  
32  
33  
34  
35 49. Li J, Fan Y, Zhong HQ, Duan XL, Chen W, Evans-Lacko S, Thornicroft G: **Effectiveness**  
36  
37 **of an anti-stigma training on improving attitudes and decreasing discrimination towards**  
38  
39 **people with mental disorders among care assistant workers in Guangzhou, China.**  
40  
41 *International Journal of Mental Health Systems* 2019, **13**:10.  
42  
43  
44  
45 50. Spitzer RL, Kroenke K, Williams JBW, Patient Hlth Questionnaire P: **Validation and**  
46  
47 **utility of a self-report version of PRIME-MD - The PHQ primary care study.** *Jama-*  
48  
49 *Journal of the American Medical Association* 1999, **282**:1737-1744.  
50  
51  
52  
53 51. Yeung A, Fung F, Yu SC, Vorono S, Ly M, Wu S, Fava M: **Validation of the Patient**  
54  
55 **Health Questionnaire-9 for depression screening among chinese Americans.**  
56  
57 *Comprehensive Psychiatry* 2008, **49**:211-217.  
58  
59  
60

- 1  
2  
3  
4 52. Spitzer RL, Kroenke K, Williams JBW, Lowe B: **A brief measure for assessing**  
5  
6 **generalized anxiety disorder - The GAD-7.** *Archives of Internal Medicine* 2006,  
7  
8 **166:1092-1097.**  
9  
10  
11  
12 53. Schalet BD, Cook KF, Choi SW, Cella D: **Establishing a common metric for self-**  
13  
14 **reported anxiety: Linking the MASQ, PANAS, and GAD-7 to PROMIS Anxiety.** *Journal*  
15  
16 *of Anxiety Disorders* 2014, **28:88-96.**  
17  
18  
19 54. He XY, Li CB, Qian J, Cui HS, Wu WYJSAoP: **Reliability and validity of a generalized**  
20  
21 **anxiety disorder scale in general hospital outpatients.** 2010, **22:200-203.**  
22  
23  
24  
25 55. Huang YX, Luo D, Chen X, Zhang DX, Wang M, Qiu YY, Liu Y, Peng BH, Niu L, Xiao  
26  
27 **SY: Changes and determinants of health-related quality of life among people newly**  
28  
29 **diagnosed with HIV in China: a 1-year follow-up study.** *Quality of Life Research* 2019,  
30  
31 **28:35-46.**  
32  
33  
34  
35 56. Zimet GD, Dahlem NW, Zimet SG, Farley GK: **The Multidimensional Scale of Perceived**  
36  
37 **Social Support.** *Journal of Personality Assessment* 1988, **52:30-41.**  
38  
39  
40 57. Zimet GD, Powell SS, Farley GK, Werkman S, Berkoff KAJJ: **Psychometric**  
41  
42 **characteristics of the Multidimensional Scale of Perceived Social Support.** 1990,  
43  
44 **55:610-617.**  
45  
46  
47  
48 58. Huang L, Jiang QJ, Ren WH: **Coping style, social support, and psychosomatic**  
49  
50 **symptoms in patients with cancer.** *Chinese Mental Health Journal* 1996, **10:160-161.**  
51  
52  
53 59. Smilkstein G: **The family APGAR: a proposal for a family function test and its use by**  
54  
55 **physicians.** *The Journal of family practice* 1978, **6:1231-1239.**  
56  
57  
58 60. Wang MW, Huang YY: **Evaluating family function in caring for a geriatric group: Family**  
59  
60

- 1  
2  
3  
4 **APGAR applied for older adults by home care nurses.** *Geriatrics & Gerontology*  
5  
6  
7 *International* 2016, **16**:716-721.
- 8  
9 61. Lim ATC, Manching J, Penserga EG: **Correlation between Family APGAR scores and**  
10  
11 **health-related quality of life of Filipino elderly patients with knee osteoarthritis.**  
12  
13  
14 *International Journal of Rheumatic Diseases* 2012, **15**:407-413.
- 15  
16  
17 62. Saameño JAB, Sánchez AD, Castillo JDLD, Claret PL: **[Validity and reliability of the**  
18  
19 **family Apgar family function test].** *Atencion Primaria* 1996, **18**:289.
- 20  
21  
22 63. Yu Y: **Study on family burden and experiences of primary caregivers of schizophrenia**  
23  
24 **in community**  
25  
26  
27 Central South University, N1 - 2020-07-22 15:50:00, 2016.
- 28  
29  
30 64. Nunnally JC: **Psychometric theory.** *American Educational Research Journal* 1978, **5**:83.
- 31  
32  
33 65. Marx RG, Menezes A, Horovitz L, Jones EC, Warren RF: **A comparison of two time**  
34  
35 **intervals for test-retest reliability of health status instruments.** *Journal of Clinical*  
36  
37 *Epidemiology* 2003, **56**:730-735.
- 38  
39  
40 66. Fayers PM, Machin D: **Quality of Life: The Assessment, Analysis and Interpretation of**  
41  
42 **Patient-Reported Outcomes: Second Edition.** 2007.
- 43  
44  
45 67. Hu L-t, Bentler PM: **Cutoff criteria for fit indexes in covariance structure analysis:**  
46  
47 **Conventional criteria versus new alternatives.** *Structural Equation Modeling: A*  
48  
49 *Multidisciplinary Journal* 1999, **6**.
- 50  
51  
52  
53 68. Byrne BM: **Structural Equation Modeling With AMOS, EQS, and LISREL: Comparative**  
54  
55 **Approaches to Testing for the Factorial Validity of a Measuring Instrument.** *International*  
56  
57 *journal of testing* 2001, **1**:55-86.  
58  
59  
60

- 1  
2  
3  
4 69. Kline R, Kline RB, Kline R: **Principles and Practice of Structural Equation Modeling.**  
5  
6 *Journal of the American Statistical Association* 2011, **101**.  
7  
8  
9 70. Mimura C, Griffiths P: **A Japanese version of the Perceived Stress Scale: cross-cultural**  
10  
11 **translation and equivalence assessment.** *BMC Psychiatry*, **8**, 1(2008-09-30) 2008, **8**.  
12  
13  
14 71. Lee EH, Chung BY, Suh CH, Jung JY: **Korean versions of the Perceived Stress Scale**  
15  
16 **(PSS-14, 10 and 4): psychometric evaluation in patients with chronic disease.**  
17  
18 *Scandinavian Journal of Caring Sciences* 2015, **29**:183-192.  
19  
20  
21  
22 72. Ingram PB, Clarke E, Lichtenberg JW: **Confirmatory Factor Analysis of the Perceived**  
23  
24 **Stress Scale-4 in a Community Sample.** *Stress and health* 2016, **32**:173-176.  
25  
26  
27 73. Öruc MÇ, Demir A: **Psychometric evaluation of perceived stress scale for Turkish**  
28  
29 **university students.** *Stress & Health* 2010, **25**:103-109.  
30  
31  
32 74. Siqueira Reis R, Ferreira Hino AA, Romélio Rodriguez Añez C: **Perceived Stress Scale.**  
33  
34 *Journal of Health Psychology* 2010, **15**:107-114.  
35  
36  
37 75. Taylor JM: **Psychometric analysis of the Ten-Item Perceived Stress Scale.**  
38  
39 *Psychological assessment* 2015, **27**:90-101.  
40  
41  
42 76. Baik SH, Fox RS, Mills SD, Roesch SC, Sadler GR, Klonoff EA, Malcarne VL: **Reliability**  
43  
44 **and validity of the Perceived Stress Scale-10 in Hispanic Americans with English or**  
45  
46 **Spanish language preference.** *Journal of Health Psychology* 2019, **24**:628-639.  
47  
48  
49 77. Ezzati A, Jiang J, Katz MJ, Sliwinski MJ, Zimmerman ME, Lipton RB: **Validation of the**  
50  
51 **Perceived Stress Scale in a community sample of older adults.** *International Journal of*  
52  
53 *Geriatric Psychiatry* 2014, **29**:645-652.  
54  
55  
56  
57  
58  
59  
60



1  
2  
3  
4  
5  
6  
7  
8  
9  
10  
11  
12  
13  
14  
15  
16  
17  
18  
19  
20  
21  
22  
23  
24  
25  
26  
27  
28  
29  
30  
31  
32  
33  
34  
35  
36  
37  
38  
39  
40  
41  
42  
43  
44  
45  
46  
47  
48  
49  
50  
51  
52  
53  
54  
55  
56  
57  
58  
59  
60

For peer review only

**Table 1. Demographic characteristics of the participants (N = 449)**

| <b>Characteristics</b> |                                  | <b>M (sd)/N (%)</b> |
|------------------------|----------------------------------|---------------------|
|                        |                                  | <b>N=449</b>        |
| Age(years)             | 18-59                            | 169 (37.6)          |
|                        | 60-100                           | 280 (62.4)          |
|                        | Mean (SD)                        | 60.90 (12.28)       |
| Gender                 | Male                             | 206 (45.9)          |
|                        | Female                           | 243 (54.1)          |
| Occupation             | Employed                         | 65 (14.4)           |
|                        | Not employed                     | 384 (85.6)          |
| Education              | Primary and below                | 130 (29.0)          |
|                        | Middle and high                  | 276 (61.5)          |
|                        | College and above                | 43 (9.5)            |
| Marital status         | Single                           | 19 (4.2)            |
|                        | Married/cohabited                | 340 (75.7)          |
|                        | Else(divorced/separated/widowed) | 90 (20.0)           |
| Kinship                | Parents                          | 254 (56.57)         |
|                        | Spouse                           | 106 (23.61)         |
|                        | Children                         | 29 (6.46)           |
|                        | Siblings                         | 49 (10.91)          |
|                        | Other                            | 11 (2.45)           |
| Income (RMB/year)      | 20000 or less                    | 254 (56.6)          |
|                        | 20001-40000                      | 99 (22.0)           |
|                        | 40000 or greater                 | 96 (21.4)           |

**Table 2. Descriptive statistics and factor loadings of the PSS-10 (N=439)**

| Items                                                   | Mean<br>(SD) | Factor<br>loading |
|---------------------------------------------------------|--------------|-------------------|
| Factor 1: Crisis perception ( $\alpha = 0.88$ )         |              |                   |
| 1. Been upset                                           | 1.75 (1.09)  | 0.78              |
| 2. Unable to control                                    | 1.80 (1.20)  | 0.83              |
| 3. Nervous and stressed                                 | 2.02 (1.15)  | 0.81              |
| 6. Could not cope                                       | 1.78 (1.09)  | 0.71              |
| 9. Been angered                                         | 1.74 (1.24)  | 0.61              |
| 10. Could not overcome                                  | 1.80 (1.20)  | 0.69              |
| Factor 2: Coping ability perception ( $\alpha = 0.79$ ) |              |                   |
| 4. Felt confident                                       | 1.68 (1.23)  | 0.60              |
| 5. Going your way                                       | 2.30 (1.17)  | 0.62              |
| 7. Control irritations                                  | 1.74 (1.11)  | 0.75              |
| 8. On top of things                                     | 1.91 (1.18)  | 0.83              |

**Table 3 Correlations of PSS-10 and its two subscales with other variables**

| Variables                      | 1       | 2       | 3       | 4       | 5       | 6       | 7      | 8      | 9    |
|--------------------------------|---------|---------|---------|---------|---------|---------|--------|--------|------|
| 1. PSS-10                      | 1.00    |         |         |         |         |         |        |        |      |
| 2. Perceived helplessness-sub  | 0.88**  | 1.00    |         |         |         |         |        |        |      |
| 3. Perceived self-efficacy-sub | 0.51**  | 0.09    | 1.00    |         |         |         |        |        |      |
| 4.PDD                          | 0.16**  | 0.14**  | 0.07    | 1.00    |         |         |        |        |      |
| 5. PHQ-9                       | 0.54**  | 0.54**  | 0.17**  | -0.02   | 1.00    |         |        |        |      |
| 6. GAD-7                       | 0.62**  | 0.65**  | 0.14**  | 0.01    | 0.72**  | 1.00    |        |        |      |
| 7.MSPSS-12                     | -0.22** | -0.13** | -0.24** | -0.31** | -0.11*  | -0.09   | 1.00   |        |      |
| 8.APGAR-5                      | -0.30** | -0.19** | -0.35** | -0.27** | -0.18** | -0.17** | 0.56** | 1.00   |      |
| 9.CRF-12                       | -0.33** | -0.15** | -0.45** | -0.27** | -0.12** | -0.08   | 0.54** | 0.66** | 1.00 |

& Spearman correlation using pairwise deletion for missing values

\*P< 0.05, \*\* P<0.01

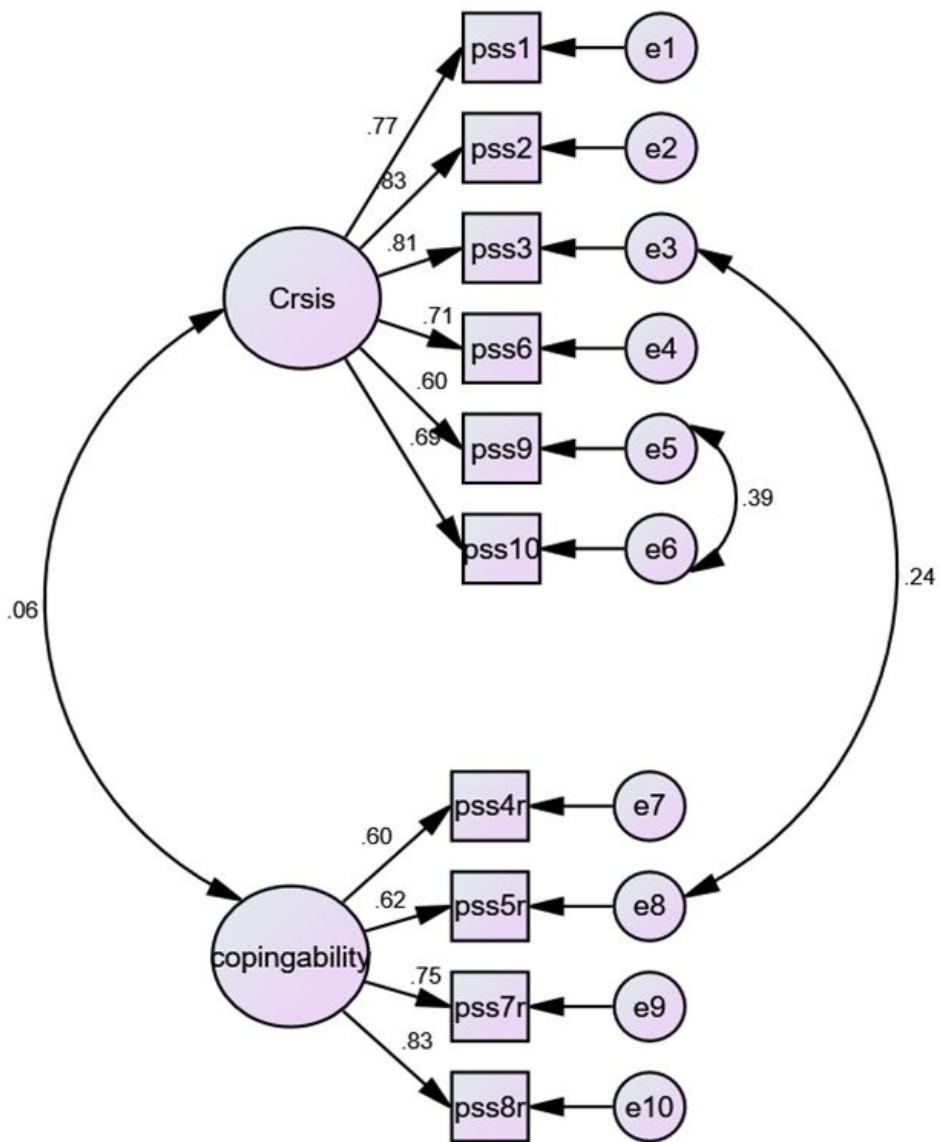

**FIGURE 1 | Standardized factor loadings for the two-factor model of the Perceived Stress Scale (PSS-10) (N=439)**

STROBE Statement—Checklist of items that should be included in reports of *cross-sectional studies*

|                              | Item No                                                                            | Recommendation                                                                                                                                                                                    | Page No |
|------------------------------|------------------------------------------------------------------------------------|---------------------------------------------------------------------------------------------------------------------------------------------------------------------------------------------------|---------|
| <b>Title and abstract</b>    | 1                                                                                  | (a) Indicate the study's design with a commonly used term in the title or the abstract                                                                                                            | 1-3     |
|                              |                                                                                    | (b) Provide in the abstract an informative and balanced summary of what was done and what was found                                                                                               | 3-5     |
| <b>Introduction</b>          |                                                                                    |                                                                                                                                                                                                   |         |
| Background/rationale         | 2                                                                                  | Explain the scientific background and rationale for the investigation being reported                                                                                                              | 6-8     |
| Objectives                   | 3                                                                                  | State specific objectives, including any prespecified hypotheses                                                                                                                                  | 7       |
| <b>Methods</b>               |                                                                                    |                                                                                                                                                                                                   |         |
| Study design                 | 4                                                                                  | Present key elements of study design early in the paper                                                                                                                                           | 8       |
| Setting                      | 5                                                                                  | Describe the setting, locations, and relevant dates, including periods of recruitment, exposure, follow-up, and data collection                                                                   | 8-9     |
| Participants                 | 6                                                                                  | (a) Give the eligibility criteria, and the sources and methods of selection of participants                                                                                                       | 8-9     |
| Variables                    | 7                                                                                  | Clearly define all outcomes, exposures, predictors, potential confounders, and effect modifiers. Give diagnostic criteria, if applicable                                                          | 8-9     |
| Data sources/<br>measurement | 8*                                                                                 | For each variable of interest, give sources of data and details of methods of assessment (measurement). Describe comparability of assessment methods if there is more than one group              | 9-13    |
| Bias                         | 9                                                                                  | Describe any efforts to address potential sources of bias                                                                                                                                         | NA      |
| Study size                   | 10                                                                                 | Explain how the study size was arrived at                                                                                                                                                         | 8-9     |
| Quantitative variables       | 11                                                                                 | Explain how quantitative variables were handled in the analyses. If applicable, describe which groupings were chosen and why                                                                      | 13      |
| Statistical methods          | 12                                                                                 | (a) Describe all statistical methods, including those used to control for confounding                                                                                                             | 13-14   |
|                              |                                                                                    | (b) Describe any methods used to examine subgroups and interactions                                                                                                                               | 13-14   |
|                              | (c) Explain how missing data were addressed                                        | NA                                                                                                                                                                                                |         |
|                              | (d) If applicable, describe analytical methods taking account of sampling strategy | NA                                                                                                                                                                                                |         |
|                              | (e) Describe any sensitivity analyses                                              | 13-14                                                                                                                                                                                             |         |
| <b>Results</b>               |                                                                                    |                                                                                                                                                                                                   |         |
| Participants                 | 13*                                                                                | (a) Report numbers of individuals at each stage of study—eg numbers potentially eligible, examined for eligibility, confirmed eligible, included in the study, completing follow-up, and analysed | 14      |
|                              |                                                                                    | (b) Give reasons for non-participation at each stage                                                                                                                                              | NA      |
|                              |                                                                                    | (c) Consider use of a flow diagram                                                                                                                                                                | NA      |
| Descriptive data             | 14*                                                                                | (a) Give characteristics of study participants (eg demographic, clinical, social) and information on exposures and potential confounders                                                          | 14      |
|                              |                                                                                    | (b) Indicate number of participants with missing data for each variable of interest                                                                                                               | NA      |
| Outcome data                 | 15*                                                                                | Report numbers of outcome events or summary measures                                                                                                                                              | 14-15   |

1  
2  
3  
4  
5  
6  
7  
8  
9  
10  
11  
12  
13  
14  
15  
16  
17  
18  
19  
20  
21  
22  
23  
24  
25  
26  
27  
28  
29  
30  
31  
32  
33  
34  
35  
36  
37  
38  
39  
40  
41  
42  
43  
44  
45  
46  
47  
48  
49  
50  
51  
52  
53  
54  
55  
56  
57  
58  
59  
60

|                          |    |                                                                                                                                                                                                              |       |
|--------------------------|----|--------------------------------------------------------------------------------------------------------------------------------------------------------------------------------------------------------------|-------|
| Main results             | 16 | (a) Give unadjusted estimates and, if applicable, confounder-adjusted estimates and their precision (eg, 95% confidence interval). Make clear which confounders were adjusted for and why they were included | NA    |
|                          |    | (b) Report category boundaries when continuous variables were categorized                                                                                                                                    | 14-15 |
|                          |    | (c) If relevant, consider translating estimates of relative risk into absolute risk for a meaningful time period                                                                                             | NA    |
| Other analyses           | 17 | Report other analyses done—eg analyses of subgroups and interactions, and sensitivity analyses                                                                                                               | 14-15 |
| <b>Discussion</b>        |    |                                                                                                                                                                                                              |       |
| Key results              | 18 | Summarise key results with reference to study objectives                                                                                                                                                     | 18    |
| Limitations              | 19 | Discuss limitations of the study, taking into account sources of potential bias or imprecision. Discuss both direction and magnitude of any potential bias                                                   | 17-18 |
| Interpretation           | 20 | Give a cautious overall interpretation of results considering objectives, limitations, multiplicity of analyses, results from similar studies, and other relevant evidence                                   | 15-18 |
| Generalisability         | 21 | Discuss the generalisability (external validity) of the study results                                                                                                                                        | 16-18 |
| <b>Other information</b> |    |                                                                                                                                                                                                              |       |
| Funding                  | 22 | Give the source of funding and the role of the funders for the present study and, if applicable, for the original study on which the present article is based                                                | 19    |

\*Give information separately for exposed and unexposed groups.

**Note:** An Explanation and Elaboration article discusses each checklist item and gives methodological background and published examples of transparent reporting. The STROBE checklist is best used in conjunction with this article (freely available on the Web sites of PLoS Medicine at <http://www.plosmedicine.org/>, Annals of Internal Medicine at <http://www.annals.org/>, and Epidemiology at <http://www.epidem.com/>). Information on the STROBE Initiative is available at [www.strobe-statement.org](http://www.strobe-statement.org).

# BMJ Open

## Psychometric validation of the Perceived Stress Scale (PSS-10) among family caregivers of people with schizophrenia in China

|                                 |                                                                                                                                                                                                                                                                                                                                                                                                                                                                                                                                                                                                                |
|---------------------------------|----------------------------------------------------------------------------------------------------------------------------------------------------------------------------------------------------------------------------------------------------------------------------------------------------------------------------------------------------------------------------------------------------------------------------------------------------------------------------------------------------------------------------------------------------------------------------------------------------------------|
| Journal:                        | <i>BMJ Open</i>                                                                                                                                                                                                                                                                                                                                                                                                                                                                                                                                                                                                |
| Manuscript ID                   | bmjopen-2023-076372.R1                                                                                                                                                                                                                                                                                                                                                                                                                                                                                                                                                                                         |
| Article Type:                   | Original research                                                                                                                                                                                                                                                                                                                                                                                                                                                                                                                                                                                              |
| Date Submitted by the Author:   | 18-Oct-2023                                                                                                                                                                                                                                                                                                                                                                                                                                                                                                                                                                                                    |
| Complete List of Authors:       | Tao, Xiao ; Central South University Third Xiangya Hospital<br>Zhu, Feng ; Central South University Xiangya School of Public Health<br>Wang, Dan ; Central South University Xiangya School of Public Health<br>Liu, Xiang ; Central South University Xiangya School of Public Health<br>Xi, Shi-jun; Central South University Xiangya School of Public Health, Department of Social Medicine and Health Management; Foshan Center for Disease Control and Prevention<br>YU, YU; Xiangya Hospital Central South University, ; Yale University School of Medicine, Division of Prevention and Community Research |
| <b>Primary Subject Heading</b>: | Mental health                                                                                                                                                                                                                                                                                                                                                                                                                                                                                                                                                                                                  |
| Secondary Subject Heading:      | Mental health, Nursing, Public health                                                                                                                                                                                                                                                                                                                                                                                                                                                                                                                                                                          |
| Keywords:                       | Psychometrics, PSYCHIATRY, Schizophrenia & psychotic disorders < PSYCHIATRY, Nursing Care                                                                                                                                                                                                                                                                                                                                                                                                                                                                                                                      |
|                                 |                                                                                                                                                                                                                                                                                                                                                                                                                                                                                                                                                                                                                |

SCHOLARONE™  
Manuscripts





I, the Submitting Author has the right to grant and does grant on behalf of all authors of the Work (as defined in the below author licence), an exclusive licence and/or a non-exclusive licence for contributions from authors who are: i) UK Crown employees; ii) where BMJ has agreed a CC-BY licence shall apply, and/or iii) in accordance with the terms applicable for US Federal Government officers or employees acting as part of their official duties; on a worldwide, perpetual, irrevocable, royalty-free basis to BMJ Publishing Group Ltd ("BMJ") its licensees and where the relevant Journal is co-owned by BMJ to the co-owners of the Journal, to publish the Work in this journal and any other BMJ products and to exploit all rights, as set out in our [licence](#).

The Submitting Author accepts and understands that any supply made under these terms is made by BMJ to the Submitting Author unless you are acting as an employee on behalf of your employer or a postgraduate student of an affiliated institution which is paying any applicable article publishing charge ("APC") for Open Access articles. Where the Submitting Author wishes to make the Work available on an Open Access basis (and intends to pay the relevant APC), the terms of reuse of such Open Access shall be governed by a Creative Commons licence – details of these licences and which [Creative Commons](#) licence will apply to this Work are set out in our licence referred to above.

Other than as permitted in any relevant BMJ Author's Self Archiving Policies, I confirm this Work has not been accepted for publication elsewhere, is not being considered for publication elsewhere and does not duplicate material already published. I confirm all authors consent to publication of this Work and authorise the granting of this licence.

## Title Page

**Title:** Psychometric validation of the Perceived Stress Scale (PSS-10) among family caregivers of people with schizophrenia in China

### Authors

**Xiao Tao (XT)**

**Degree:** Master

**Affiliation:** Nursing Department, The Third Xiangya Hospital, Central South University, Changsha, Hunan, China.

**Address:** 138 Tongzipo Road, Yuelu District Changsha, Hunan, China 410013

**Email:** 1823308475@qq.com

**Tel:** +86-(0)731-88618627

**Feng Zhu (FZ)**

**Degree:** Master

**Affiliation:** Department of Social Medicine and Health Management, Xiangya School of Public Health, Central South University

**Address:** Upper Mayuanlin Road 238, Changsha, Hunan 410008, China

**E-mail:** [zhufengastrid0403@163.com](mailto:zhufengastrid0403@163.com)

**Dan Wang (DW)**

**Degree:** Master

**Affiliation:** Department of Social Medicine and Health Management, Xiangya School of Public Health, Central South University

1  
2  
3  
4 **Address:** Upper Mayuanlin Road 238, Changsha, Hunan 410008, China  
5

6 **E-mail:** [wangdan1716@163.com](mailto:wangdan1716@163.com)  
7  
8  
9

10  
11  
12 **Xiang Liu (XL)**  
13

14 **Degree:** Master  
15

16  
17 **Affiliation:** Department of Social Medicine and Health Management, Xiangya School  
18  
19 of Public Health, Central South University  
20

21  
22 **Address:** Upper Mayuanlin Road 238, Changsha, Hunan 410008, China  
23

24 **E-mail:** 634473729@qq.com  
25  
26  
27  
28  
29

30 **Shi-jun Xi (SJX) \* (corresponding author)**  
31

32 **Degree:** Master  
33

34  
35 **Affiliation:** Department of Social Medicine and Health Management, Xiangya School  
36  
37 of Public Health, Central South University; Foshan Center for Disease Control and  
38  
39 Prevention  
40

41  
42 **Address:** Upper Mayuanlin Road 238, Changsha, Hunan 410008, China; Yingyin Road  
43  
44 3, Chancheng District, Foshan 528000, China  
45

46 **E-mail:** 2324411296@qq.com; xishijun111@163.com  
47  
48  
49  
50  
51

52  
53 **Yu Yu (YY)**  
54

55 **Degree:** PhD  
56

57  
58 **Affiliation:** Department of Social Medicine and Health Management, Xiangya School  
59  
60

1  
2  
3  
4 of Public Health, Central South University; Division of Prevention and Community  
5  
6  
7 Research, Department of Psychiatry, Yale School of Medicine

8  
9 **Address:** Upper Mayuanlin Road 238, Changsha, Hunan 410008, China; 389 Whitney  
10  
11 Avenue, New Haven, CT 06511, USA

12  
13  
14 **Email:** [yuyu2016@csu.edu](mailto:yuyu2016@csu.edu); [yu.yu@yale.edu](mailto:yu.yu@yale.edu)  
15  
16  
17  
18  
19  
20  
21  
22  
23  
24  
25  
26  
27  
28  
29  
30  
31  
32  
33  
34  
35  
36  
37  
38  
39  
40  
41  
42  
43  
44  
45  
46  
47  
48  
49  
50  
51  
52  
53  
54  
55  
56  
57  
58  
59  
60

For peer review only

## Abstract

**Background:** The 10-item Perceived Stress Scale (PSS-10) is a widely used measure of perceived stress that has been validated in various populations, yet with inconsistent results on its factor structure. The present study examines the reliability and validity of the PSS-10 in a population not previously examined: Chinese family caregivers of persons with schizophrenia, with a focus on factor analysis.

**Methods:** A sample of 449 family caregivers of persons with schizophrenia were recruited for psychometric testing of the scale. The factor structure of PSS-10 was tested by randomly dividing the sample into two groups for both exploratory factor analysis (EFA) and confirmatory factor analysis (CFA). The scale was further tested for internal consistency, test-retest reliability, convergent validity, discriminant validity, and concurrent validity.

**Results:** EFA extracted two factors: perceived helplessness with 6 negative phrasing items and perceived efficacy with 4 positive phrasing items. CFA confirmed the structure of two factors with satisfactory model fit indices. Convergent validity was supported by high standard regression weight (SRW=0.78-0.92), average variance extracted (AVE=0.79-0.81), and composite reliability (CR=0.88-0.94), while discriminant validity was confirmed by higher AVE estimates than the squared inter-construct correlations. The PSS-10 showed good internal consistency and test-retest reliability, with Cronbach's alpha of 0.79 and ICC of 0.91, respectively. Concurrent validity was demonstrated by its significant positive correlations with stigma, depression, and anxiety, as well as significant negative correlations with social support,

1  
2  
3  
4 family functioning, and positive caregiving experiences.  
5

6 **Conclusion:** The two-factor PSS-10 has good psychometric characteristics assessing  
7  
8 the perceived stress of family caregivers of people with schizophrenia. The findings  
9  
10 indicate that the PSS-10 can be used to measure perceived stress in future research and  
11  
12 practice among caregivers of people with schizophrenia, and potentially, other  
13  
14 caregiving samples.  
15  
16  
17  
18  
19  
20  
21

22 **Keywords:** 10-item Perceived Stress Scale (PSS-10), psychometric testing,  
23  
24 reliability, validity, exploratory factor analysis (EFA), confirmatory factor analysis  
25  
26 (CFA)  
27  
28  
29  
30  
31

### 32 **Strengths and limitations of this study**

- 35 1. The first study to validate the most widely used 10-item Perceived Stress Scale  
36  
37 (PSS-10) among a most stressed yet understudied population--- family  
38  
39 caregivers of people with schizophrenia.  
40  
41
- 42 2. The factor structure of PSS-10 was tested by randomly dividing the sample  
43  
44 into two groups for both exploratory factor analysis (EFA) and confirmatory  
45  
46 factor analysis (CFA).  
47  
48
- 49 3. An exhaustive testing of multiple psychometric properties of the PSS-10  
50  
51 including EFA, CFA, internal consistency, test-retest reliability, convergent  
52  
53 validity, discriminant validity, and concurrent validity.  
54  
55
- 56 4. The cross-sectional design of the study may preclude testing of sensitivity to  
57  
58  
59  
60

change for the PSS-10.

## **Psychometric validation of the Perceived Stress Scale (PSS-10) among family caregivers of people with schizophrenia in China**

### **Introduction**

Schizophrenia is a severe, debilitating chronic psychiatric disorder that causes impairments in cognition, speech, thinking, and emotional responsiveness [1]. It impairs individuals' social and occupational functioning, as well as limits their ability to carry out daily activities [2]. For instance, Wiersma et al. (2000) conducted a 15-year multicenter survey in Europe and found that social dysfunction was widespread and persistent in schizophrenia [3]. Similar findings were also reported in China [4]. Consequently, people with schizophrenia often require ongoing support and care, which in many Asian countries, is often provided by family members [5]. In China, efforts have been made to establish community-based rehabilitation services for people with schizophrenia but with family members assuming the major role of caregiving [6]. These family caregivers represent a large and invisible group to substitute for the under-resourced mental health service system to provide high-quality care to people with schizophrenia[7]. Caring for people with schizophrenia can be a demanding activity that challenges the physical and mental health of family caregivers [8]. As a result, family caregivers may report a high level of stress, which can lead to negative health outcomes and reduced quality of life [9].

Studies have shown that the stress experienced by family caregivers of people with

1  
2  
3  
4 schizophrenia is higher than for caregivers of people with other prolonged illnesses,  
5  
6 which is related to higher psychological distress, depression, and anxiety [10, 11].  
7  
8  
9 Caregivers' stress may also result in conflict among family members and increased  
10  
11 family dysfunction [8, 12]. These caregivers also report increased perceived stigma due  
12  
13 to their loved one's mental illness [13-15] as well as insufficient social support [13].  
14  
15  
16 For example, family caregivers may report shame due to disruptive public behaviors of  
17  
18 the family member with schizophrenia and seek to hide them from the public as much  
19  
20 as possible [16, 17]. This can result in social isolation, lack of social support, and social  
21  
22 exclusion, which may further aggravate their stress [16, 17]. Thus, it is both important  
23  
24 and meaningful to assess their stress levels using reliable and valid scales, which not  
25  
26 only helps strengthen our understanding of their mental well-being for further  
27  
28 intervention and support but also can guide the assessment of future intervention effects.  
29  
30  
31  
32  
33

34  
35 The perceived stress scale (PSS) is one of the most widely used measures for  
36  
37 assessing perceived stress in the world [18, 19]. The PSS measures the degree to which  
38  
39 participants perceive unpredictability, lack of control, or overload in their life. The  
40  
41 original PSS included 14 items (PSS-14), which were further abbreviated into two short  
42  
43 versions: PSS-10 and PSS-4 [18, 20]. Although the original PSS-14 showed sufficient  
44  
45 validity and reliability, the shorter version (PSS-10) has superior psychometric  
46  
47 properties and is recommended for research [21]. The PSS-10 has been translated into  
48  
49 various languages and validated in various countries, such as Sweden [22], France [23],  
50  
51 Korea [24], Mexico [25], the United States [26], Arabia [27], Serbia [28], Germany [29],  
52  
53 Viet Nam [30], Brazil [31] and Thailand [32]. The PSS-10 was first translated into  
54  
55  
56  
57  
58  
59  
60



1  
2  
3  
4 Simplified Chinese (the language of the Chinese mainland) by Yang and Huang in 2003  
5  
6 [33], and approved by its original developer Dr. Cohen [34]. The Simplified Chinese  
7  
8 version of the PSS-10 (C-PSS-10) has been used with various populations including  
9  
10 university students [35], elderly service workers [36], and cardiac patients [37], but its  
11  
12 psychometric properties among family caregivers of individuals with prolonged  
13  
14 illnesses, such as with schizophrenia, has not been examined in Chinese communities.  
15  
16 In addition, although there are abundant psychometric testing studies on PSS-10,  
17  
18 inconsistencies exist in the results of its factor structure. Although the original  
19  
20 developer considered it as a uni-dimensional measure[18, 20], dozens of subsequent  
21  
22 studies have proposed a two-factor structure[38-40], and there are also a few studies  
23  
24 showing a three-factor structure[41, 42].  
25  
26  
27  
28  
29  
30  
31

32 Given the lack of validation of PSS-10 among family caregivers of people with  
33  
34 schizophrenia and the conflicting evidence on its factor structure, we conducted the  
35  
36 current study to run a comprehensive psychometric testing on the PSS-10 among a  
37  
38 Chinese community sample of family caregivers of people with schizophrenia.  
39  
40 Specifically, we tested the factor structure of PSS-10 by randomly dividing the sample  
41  
42 into two groups for exploratory factor analysis (EFA) and confirmatory factor analysis  
43  
44 (CFA), respectively. In addition, we examined other psychometric properties of PSS-  
45  
46 10 including internal consistency reliability, test-retest reliability, convergent validity,  
47  
48 discriminant validity, and concurrent validity.  
49  
50  
51  
52  
53  
54  
55  
56  
57

## 58 **Materials and methods**

59  
60

## Participants and procedure

This cross-sectional study used baseline data from a large community sample who agreed to participate in an intervention to support family caregivers of people with schizophrenia [43]. A total of 449 family caregivers of people with schizophrenia were recruited from 12 communities affiliated with the Changsha Psychiatric Hospital through the "686 program". "686 program" is China's largest demonstration project aimed at integrating hospital and community services for serious mental illness [44]. The Changsha Psychiatric Hospital has provided mental health services to the 12 communities, including free antipsychotic medicine delivery. Every month, a medical team from the Changsha Psychiatric Hospital went to each community health center to distribute free medicine and run routine health check-ups for registered clients with serious mental illnesses. Inclusion criteria of family caregivers were: 1) caring for a family member registered in the "686 program" and satisfied the Chinese classification of Mental Disorders (CCMD-3) or the international classification of Schizophrenia (ICD-10) criteria for schizophrenia; 2) living with the care recipient for at least the last two years; 3) aged  $\geq 18$  years; 4) able to read and communicate and complete the questionnaire. Exclusion criteria included: 1) care recipient not registered in the 686 program; 2) care recipient diagnosed with a mental illness other than schizophrenia, such as depression and epilepsy; 3) care recipient living alone; 4) family caregiver having a serious physical or mental illness and thus were unable to communicate and complete the interview; 5) family caregiver younger than 18 years. Our final sample size was 449 participants, satisfying the sample size requirement of at least 10

1  
2  
3  
4 participants for each item in psychometric testing of scales [45].  
5

6 Data collection was conducted from May 2019 and September 2019. Family  
7 caregivers were approached during the free medicine delivery process by the medical  
8 team and invited to participate in the study. The medical team explained in detail about  
9 the study and referred interested caregivers to our research team. The research team  
10 fully explained the research to each family caregiver and fully informed the benefits  
11 and risks of participation, as well as their right to withdraw at any time. After providing  
12 written informed consent, the caregivers received face-to-face interviews conducted by  
13 our research team and completed a battery of questionnaires. The entire interview took  
14 approximately 20-40 minutes, and each participant was reimbursed RMB 20 yuan  
15 (USD 2.80) for the completion of the questionnaire.  
16  
17  
18  
19  
20  
21  
22  
23  
24  
25  
26  
27  
28  
29  
30  
31

### 32 **Patient and Public Involvement Statement**

33  
34  
35 None  
36

### 37 **Instruments**

#### 38 **Perceived stress scale (PSS-10)**

39  
40  
41 The 10-item perceived stress scale (PSS-10) is a self-assessed measure of  
42 psychological stress experienced over the past 30 days[18, 20]. The scale includes 6  
43 negative items (item 1,2,3,6,9,10) assessing the degree of lack of control and negative  
44 reactions (also named as negative stress, perceived helplessness, or perceived stress),  
45 as well as 4 positive items (item 4,5,7,8) assessing one's ability to cope with existing  
46 stressors (also named as positive stress, perceived efficacy, or perceived control) [37,  
47 48  
49 50  
51 52  
53 54  
55 56  
57 58  
59 46]. Each answer is scored on a 5-point Likert scale ranging from 0 (never) to 4 (very  
60

1  
2  
3  
4 often) and the 4 positive items are reverse-coded so that higher scores indicate higher  
5  
6 stress. The total score of PSS-10 ranges from 0 to 40, with higher scores indicating  
7  
8 greater perceived stress and scores of 10 or more indicating moderate to high perceived  
9  
10 stress [47]. The Chinese version of PSS-10 used in the present study showed  
11  
12 satisfactory internal consistency, with a Cronbach's  $\alpha$  of 0.79.  
13  
14  
15

### 16 17 **Perceived Devaluation and Discrimination Scale (PDD)**

18  
19 The 12-item Perceived Devaluation and Discrimination Scale (PDD), originated  
20  
21 from the Link disease stigma scale series, is a widely used scale for measuring  
22  
23 perceived stigma [48-50]. The PDD includes two factors: devaluation (5 items) and  
24  
25 discrimination (7 items). Each item is scored on a 5-point Likert scale ranging from 1  
26  
27 (fully agree) to 5 (totally disagree). Items 1, 2, 3, 4, 8, and 10 are reverse-coded. The  
28  
29 total score ranges from 12 to 60, with higher scores indicating higher levels of perceived  
30  
31 stigma [51]. The PDD showed good reliability with a Cronbach's alpha of 0.78 in the  
32  
33 original study[48]. The Chinese version of PDD also showed good reliability in other  
34  
35 studies[52]. In the current study, the PDD showed acceptable internal consistency with  
36  
37 a Cronbach's alpha of 0.70.  
38  
39  
40  
41  
42  
43  
44

### 45 46 **Patient health questionnaire (PHQ-9)**

47  
48 The 9-item Patient Health Questionnaire (PHQ-9) is one of the most widely used  
49  
50 screening tools for assessing depressive symptoms over the previous two weeks [53].  
51  
52 Each item is scored on a 4-point Likert scale ranging from 0 (not at all) to 3 (nearly  
53  
54 every day). The total score ranges from 0 to 27, with higher scores indicating more  
55  
56 severe depressive symptoms and a cutoff value of 10 distinguishing between depression  
57  
58  
59  
60

1  
2  
3  
4 and non-depression. The PHQ-9 was first translated into Chinese by Yeung et al. in  
5  
6 2008 and showed good reliability and validity in the Chinese population [54]. The  
7  
8 Chinese version of PHQ-9 shows good internal consistency in the current study, with a  
9  
10 Cronbach's Coefficient of 0.93.  
11  
12

### 13 14 **Generalized anxiety disorder scale (GAD-7)**

15  
16  
17 The 7-item Generalized Anxiety Disorder scale (GAD-7) is one of the most widely  
18  
19 used screening tools for assessing anxiety symptoms during the previous two weeks  
20  
21 [55]. Each item is scored on a 4-point Likert scale ranging from 0 (not at all) to 3 (nearly  
22  
23 every day). The total score ranges from 0 to 21, with higher scores indicating more  
24  
25 severe anxiety symptoms and a cutoff value of 10 distinguishing between anxiety and  
26  
27 non-anxiety [56]. The GAD-7 was first translated into translated it into Chinese by He  
28  
29 X et Al. [57], and showed good reliability and validity in the Chinese population[58].  
30  
31 The Chinese version of GAD-7 showed good internal consistency in the current study,  
32  
33 with a Cronbach's Coefficient of 0.95.  
34  
35  
36  
37  
38  
39

### 40 **Multidimensional scale of perceived social support (MSPSS)**

41  
42  
43 The 12-item perceived social support multidimensional scale (MSPSS) is a widely  
44  
45 used scale to measure the strength of support respondents received from three different  
46  
47 sources: family, friends, and significant others [59]. Each item is scored on a 7-point  
48  
49 Likert scale ranging from 1 (very strongly disagree) to 7 (very strongly agree). The total  
50  
51 score ranges from 12 to 84, with higher scores indicating higher social support [59, 60].  
52  
53 The MSPSS was first translated into Chinese by Huang L et al in 1996[61]. It showed  
54  
55 good reliability with a Cronbach's alpha of 0.85-0.91 in the original study [60]. The  
56  
57  
58  
59  
60

1  
2  
3  
4 Chinese version of MSPSS in the current study showed good internal consistency with  
5  
6 a Cronbach's Coefficient of 0.95.  
7  
8

9 **Family adaptation, partnership, growth, affection, and resolve index scale**  
10  
11 **(APGAR)**  
12

13  
14 The 5-item Family adaptation, partnership, growth, affection, and resolve index scale  
15  
16 (APGAR) is a widely used scale to measure one's satisfaction with their family  
17  
18 functionality. Each item is scored on a 3-point Likert scale ranging from 0 (almost never)  
19  
20 to 2 (almost always) [62]. The total score ranges from 0 to 10, with a higher score  
21  
22 indicating higher satisfaction with family functioning. The APGAR has been widely  
23  
24 used and well-validated in many previous studies, with Cronbach  $\alpha$  of 0.86 in the initial  
25  
26 rating [63-65]. The Chinese version of APGAR in the current study showed good  
27  
28 internal consistency with a Cronbach's Coefficient of 0.95.  
29  
30  
31  
32  
33  
34

35 **Caregiving rewarding feelings (CRF)**  
36

37  
38 The 12-item caregiving rewarding feelings (CRF) measures the positive emotions of  
39  
40 caregivers during the care of a family member with schizophrenia. CRF was initially  
41  
42 developed based on qualitative interviews with 30 primary caregivers of people with  
43  
44 schizophrenia, then validated in a larger sample. The development and validation of the  
45  
46 CRF have been described elsewhere [66, 67]. Some sample items include whether  
47  
48 caring for a family member with schizophrenia makes them become "more loving and  
49  
50 patient" "gain a lot of respect " "more active and optimistic, " "more responsible". Each  
51  
52 item is scored on a 4-point Likert scale ranging from 0 "never" to 3 "nearly always".  
53  
54  
55  
56  
57  
58  
59  
60

1  
2  
3  
4 The total score ranges from 0 to 36, with higher scores indicating more positive feelings.  
5

6 The CRF in the current study showed good reliability with a Cronbach's alpha of 0.96.  
7  
8  
9

## 10 11 **Statistical analyses** 12

13  
14 Amos 22.0 (SPSS Inc., Chicago, IL, USA) and IBM SPSS statistics 23 (IBM,  
15 Armonk, New York, America) were used for statistical analyses. The  
16 sociodemographic characteristics of the samples were examined using descriptive  
17 statistics, including mean and standard deviation (SD) for continuous variables, and  
18 frequency and percentage for categorical variables.  
19  
20  
21  
22  
23  
24  
25

26  
27 The factor structure of the PSS-10 was evaluated by both exploratory factor analysis  
28 (EFA) and confirmatory factor analysis (CFA). The total sample was randomly and  
29 equally divided into group 1 for EFA to build the model and group 2 for CFA to verify  
30 the model. Kaiser–Meyer–Olkin (KMO) and Bartlett's test of sphericity were used to  
31 test whether our data were suitable for factor analysis[68]. In EFA, principal component  
32 factor analysis with oblique rotation was conducted to assess the underlying structure  
33 of the PSS-10. Factors were extracted based on two criteria: (1) factors with eigenvalues  
34 greater than 1, and (2) items with factor loadings greater than 0.40[68, 69].  
35  
36  
37  
38  
39  
40  
41  
42  
43  
44  
45  
46  
47

48 The theoretical model identified in EFA was further tested by CFA using the second  
49 sample. Kline and Byrne suggested the following CFA goodness-of-fit measures for  
50 model fit evaluation: goodness-of-fit index (GFI) >0.9, adjust goodness-of-fit  
51 index(AGFI)>0.9, comparing fit index (CFI)>0.9, non-normal fit index (NNFI)>0.90,  
52 standard root mean square residual (SRMR)<0.08, root mean square error of  
53  
54  
55  
56  
57  
58  
59  
60

1  
2  
3  
4 approximate (RMSEA) $<0.08$ , Tucker-Lewis Index (TLI) $>0.9$ [70-72]. Once a good fit  
5  
6 was established, construct validity was further tested by calculating the following  
7  
8 indicators: standard regression weight (SRW), average variance extracted (AVE), and  
9  
10 composite reliability (CR). According to Hair et al. [73], SRW  $\geq 0.50$ , AVE  $\geq 0.50$ , and  
11  
12 CR $\geq 0.70$  indicate good convergent validity, while AVE for each construct greater than  
13  
14 CR $\geq 0.70$  indicate good convergent validity, while AVE for each construct greater than  
15  
16 the squared inter-construct correlations indicates good discriminant validity.  
17

18  
19 Internal consistency reliability was assessed using Cronbach  $\alpha$  for the total scale of  
20  
21 PSS-10 and its subscales. A Cronbach  $\alpha$  level of  $\geq 0.70$  indicates good reliability [74].  
22  
23 Test-retest reliability was calculated in a subsample of these participants (n =25) who  
24  
25 were randomly assessed again 2 weeks later to allow calculation of the intraclass  
26  
27 correlation coefficient (ICC). An ICC value of  $\geq 0.75$  indicates good test-retest  
28  
29 reliability[75, 76].  
30  
31  
32  
33

34  
35 Concurrent validity of the PSS-10 was assessed using Pearson product-moment  
36  
37 correlations with expected significant positive correlations with perceived stigma (as  
38  
39 measured by PDD), depression (as measured by PHQ-9), and anxiety (as measured by  
40  
41 GAD-7); as well as expected significant negative correlations with social support (as  
42  
43 measured by MSPSS), family functioning (as measured by APGAR), and positive  
44  
45 caregiving experiences (as measured by CRF).  
46  
47  
48  
49  
50

## 51 52 53 **Results**

### 54 55 56 **Sample demographics**



1  
2  
3  
4 Table 1 shows the socio-demographic characteristics of the sample. The caregivers  
5  
6 had a mean (SD) age of 60.90 (12.28) years. Most caregivers were spouses or parents  
7  
8 (80.18%), not employed (85.6%), of middle and high school education (61.5%), and  
9  
10 married/cohabited (75.7%). Over half were female (54.1%) and had an annual income  
11  
12 of lower than 20,000 RMB (56.6%).  
13  
14  
15

### 16 17 **Exploratory factor analysis**

18  
19 The underlying factor structure of the PSS-10 was first examined using EFA on the  
20  
21 first half sample (N = 218). Kaiser–Meyer–Olkin test showed a KMO value of 0.93,  
22  
23 indicating good sampling adequacy. Bartlett’s test of sphericity ( $\chi^2 = 1896.319$ ;  $df = 45$ ,  
24  
25  $p < 0.001$ ) also suggested that inter-item correlations were large enough to perform  
26  
27 EFA.  
28  
29  
30

31  
32 Further EFA yielded a two-factor solution with two initial eigenvalues above 1  
33  
34 (3.48/1.80) and all items with factor loadings  $>0.40$ , which satisfied the predetermined  
35  
36 factor extraction criteria (Table 2). The two-factor structure accounted for 89.5 % of  
37  
38 the total variance in the sample. The first factor was labeled as “perceived efficacy”,  
39  
40 with an explained variance of 65.6%, and included all 6 negative items, with factor  
41  
42 loadings ranging from 0.70-0.82. The second factor was labeled as “perceived efficacy”,  
43  
44 with an explained variance of 23.9%, and included all 4 negative items, with factor  
45  
46 loadings ranging from 0.60-0.78. The inter-factor correlation was 0.60, suggesting  
47  
48 overall high inter-correlations between the two factors.  
49  
50  
51  
52  
53  
54  
55  
56  
57

### 58 **Confirmatory factor analysis**

1  
2  
3  
4 The two-factor structure of PSS-10 identified in EFA was further tested using CFA  
5  
6 on the second half sample (N=218). The two-factor structure was supported by the  
7  
8 following goodness-of-fit statistics:  $\chi^2/df = 2.628 < 3$ ,  $p < 0.001$ ; GFI=0.963;  
9  
10 AGFI=0.937; CFI=0.972; NNFI=0.961; TLI=0.961; RMSEA=0.061; SRMR=0.061.  
11  
12 All these indexes indicated a good or acceptable model fit. Figure 1 shows a  
13  
14 visualization of the two-factor model.  
15  
16  
17

18  
19 Table 3 shows correlations between CFA factors, Composite Reliability (CR), and  
20  
21 Average Variance Extracted (AVE). The two subscales of the PSS-10 were all  
22  
23 significantly associated with the total PSS-10 scale as well as each other, with  
24  
25 correlation coefficients  $>0.50$ , indicating a large effect size. The CFA demonstrated  
26  
27 good convergent validity of the PSS-10, with statistically significant SRW  $>0.50$  (0.78-  
28  
29 0.92, Table 2), AVE  $>0.50$  (0.79-0.81, Table 3), and composite reliability (CR)  $>0.70$   
30  
31 (0.88-0.94, Table 3). In addition, the CFA also confirmed good discriminant validity of  
32  
33 the CRF, with each factor AVE estimate being higher than the squared inter-construct  
34  
35 correlations with which it was associated (Table 3).  
36  
37  
38  
39  
40  
41  
42

### 43 **Reliability**

44  
45 Internal consistency reliability, as measured by Cronbach's alpha coefficient, was  
46  
47 0.79 for the total score of the PSS-10, 0.88 for the subscale of perceived helplessness,  
48  
49 and 0.79 for the subscale of perceived efficacy. These results indicate good internal  
50  
51 consistency reliability. The ICC for the total score was 0.91 ( $p < 0.001$ ), exceeding the  
52  
53 recommended standard of 0.75 and indicating good test-retest reliability.  
54  
55  
56  
57

### 58 **Concurrent validity**

1  
2  
3  
4 The concurrent validity of PSS-10 was verified using correlational analysis. As  
5  
6 shown in Table 4, the scores of PSS-10 and its two subscales were significantly  
7  
8 positively correlated with PDD (r: 0.07 to 0.16), PHQ-9 (r: 0.17 to 0.54), and GAD-7  
9  
10 (r: 0.14 to 0.62). The scores of PSS-10 and its two subscales were significantly  
11  
12 negatively correlated with MSPSS-12 (r: - 0.24 to - 0.13), APGAR-5 (r: - 0.35 to -  
13  
14 0.19), and CRF-12 (r: - 0.45 to - 0.33). All the correlation coefficients were significant  
15  
16 at  $p = 0.01$ , which confirmed the concurrent validity of PSS-10.  
17  
18  
19  
20  
21  
22  
23  
24

## 25 Discussion

26  
27 PSS-10 is one of the most widely used scales for stress assessment and has been  
28  
29 translated into more than 20 languages [21]. However, PSS-10 has never been validated  
30  
31 among family caregivers of people living with schizophrenia in China, an important yet  
32  
33 understudied population that has been providing free and high-quality care to their  
34  
35 loved ones with schizophrenia. In addition, factor analysis of the PSS-10 by previous  
36  
37 studies has shown inconsistencies in its factor structures, with one, two, and three  
38  
39 factors being proposed. This study tested the psychometric properties of the Chinese  
40  
41 version of PSS-10 among family caregivers of people with schizophrenia, with a focus  
42  
43 on factor analysis by randomly dividing the sample into two groups for EFA and CFA.  
44  
45  
46  
47  
48  
49

50 Our results supported a two-factor structure of the PSS-10, with EFA yielding a two-  
51  
52 factor structure, which was further verified by CFA with satisfactory model fit.  
53  
54 Convergent validity was supported by high SRW, AVE, and construct reliability (CR),  
55  
56 while discriminant validity was confirmed by higher AVE estimates than the squared  
57  
58  
59  
60

1  
2  
3  
4 inter-construct correlations. Overall, the PSS-10 showed good internal consistency with  
5  
6 a high Cronbach  $\alpha$  coefficient, and good test–retest reliability with a high ICC. The  
7  
8 concurrent validity of the pss-10 was also supported by its significant positive  
9  
10 correlations with stigma, depression, and anxiety, and significant negative relationships  
11  
12 with social support, family functioning, and caregiving rewarding feelings. Thus, the  
13  
14 two-factor PSS-10 demonstrated psychometrically sound properties for assessing the  
15  
16 subjective experience of stress among caregivers of people with schizophrenia.  
17  
18  
19  
20  
21

22 Our preliminary exploratory factor analysis showed a two-factor structure of PSS-  
23  
24 10: perceived helplessness and perceived efficacy. Perceived helplessness includes 6  
25  
26 negative phrasing items (items 1,2,3,6,9,10) that reflect a lack of control and negative  
27  
28 emotions, while perceived efficacy includes 4 positive phrasing items (items 4,5,7, 8)  
29  
30 that reflect confidence in dealing with things and positive emotions. Also, in line with  
31  
32 our theoretical hypothesis, all items of PSS-10 had high factor loadings on their  
33  
34 specified factors, further showing the robustness of the two-factor structure of the PSS-  
35  
36 10. Subsequent confirmatory factor analysis also showed favorable model fit indices,  
37  
38 further corroborating the two-factor structure of PSS-10. In addition, the CFA also  
39  
40 demonstrated good convergent validity of the CRF, with statistically significant  
41  
42 SRW  $>0.50$ , AVE  $>0.50$ , and construct reliability (CR)  $>0.70$ , as well as good  
43  
44 discriminant validity, with each factor AVE estimate being higher than the squared  
45  
46 inter-construct correlations. Our findings were consistent with previous research  
47  
48 showing a similar two-factor structure of PSS-10 in other populations, such as  
49  
50 university students [35, 55, 77], general adult samples [34, 36, 78-80], and clinical  
51  
52  
53  
54  
55  
56  
57  
58  
59  
60

1  
2  
3  
4 patients [37, 81]. What is noteworthy is that there has been wide debate about whether  
5  
6 PSS-10 should be used as a full scale [20, 31, 34], or two separate subscales. Some  
7  
8 researchers believe that the two subscales measure different components of the stress  
9  
10 experience [80] and have suggested using them separately [82]. In the current study,  
11  
12 the high correlation coefficient of 0.60 between the two subscales implies that the two  
13  
14 factors are highly correlated yet not redundant with each other. As a result, it is  
15  
16 suggested the PSS-10 can be used as a whole scale or as two subscales depending on  
17  
18 the research questions under study.  
19  
20  
21  
22  
23  
24  
25

26 The Cronbach  $\alpha$  value for the total scale and two subscales of PSS-10 exceeded the  
27  
28 recommended 0.70, indicating high internal consistency reliability. This finding is  
29  
30 consistent with previous studies of Chinese [34-36] and non-Chinese samples, such as  
31  
32 Japan [83], South Korea [84], the United States [85], and Sweden [22]. High test-retest  
33  
34 reliability was supported by a high ICC of the total score, also showing the stability of  
35  
36 PSS-10 in assessing perceived stress over time. However, test-retest reliability findings  
37  
38 must be interpreted with caution because of the relatively small sample size. Future  
39  
40 research may benefit from using a larger sample size to examine test-retest reliability.  
41  
42  
43  
44  
45  
46

47 The concurrent validity of PSS-10 was demonstrated by its significant positive  
48  
49 correlations with PDD, PHQ-9, and GAD-7, as well as significant negative correlations  
50  
51 with MSPSS12, APGAR, and CRF. This finding is consistent with previous studies  
52  
53 showing negative health outcomes related to high perceived stress among caregivers of  
54  
55 people with schizophrenia, such as increased depression and anxiety, decreased family  
56  
57 functioning and rewarding feelings, which may be related to their increased feelings of  
58  
59  
60

1  
2  
3  
4 stigma and reduced social support [11, 13, 26] Understanding the relationship between  
5  
6 perceived stress and health outcomes of family caregivers may guide further family  
7  
8 caregiver interventions.  
9  
10

11  
12  
13 The present study also had several limitations. First, the sample was recruited from  
14  
15 12 urban communities of Changsha city and thus may not be representative of other  
16  
17 areas, especially rural communities. Future multi-center studies may address this issue.  
18  
19 Second, the cross-sectional design of the study may preclude testing of sensitivity to  
20  
21 change for the PSS-10; subsequent longitudinal research should examine this. Third,  
22  
23 test-retest reliability was based on a relatively small sample size, which may be further  
24  
25 confirmed in a larger sample.  
26  
27  
28  
29  
30

## 31 32 **Conclusion**

33  
34  
35  
36 In summary, the PSS-10 has good psychometric characteristics assessing the  
37  
38 perceived stress of family caregivers of people living with schizophrenia, including  
39  
40 good internal consistency, test-retest reliability, convergent validity, discriminant  
41  
42 validity, and concurrent validity. Both exploratory factor analysis and confirmatory  
43  
44 factor analysis supported a two-factor structure: perceived helplessness and perceived  
45  
46 efficacy in the current population. Our findings provide reliable evidence for the use of  
47  
48 PSS-10 in future studies to assess perceived stress among caregivers of people living  
49  
50 with schizophrenia, and potentially, other caregiving samples.  
51  
52  
53  
54  
55  
56  
57

## 58 **Acknowledgments**

59  
60

1  
2  
3  
4 This work was funded by a grant from the National Natural Science Foundation of  
5  
6 China (Grant Number 71804197). The authors would like to thank all the families of  
7  
8 the persons with schizophrenia for their participation in the WIFI program and for  
9  
10 openly sharing their feelings and experiences. We also thank the Changsha Psychiatric  
11  
12 Hospital as well as the 12 community health centers for their collaboration and support.  
13  
14  
15  
16  
17  
18

### 19 **Competing interests**

20  
21  
22 The authors declare that they have no competing interests.  
23  
24  
25  
26

### 27 **Authors' contributions:**

28  
29 All authors have made substantial contributions to the study conception and design,  
30  
31 data collection and analysis, as well as to the development and editing of the manuscript.  
32  
33 XT, SJX, and YY contributed to the conception and design of the study, XT, SJX, FZ,  
34  
35 DW, XL, and YY contributed to the research conduction and data collection, XT, SJX,  
36  
37 and FZ contributed to data analyses, DW, XL, XT, SJX, and YY contributed to data  
38  
39 interpretation. XT and SJX drafted the article while XT, XSJ, FZ, DW, XL, and YY  
40  
41 critically appraised it and revised it. All authors approved the final version of the  
42  
43 manuscript for submission and publication and agreed to be accountable for all aspects  
44  
45 of the work.  
46  
47  
48  
49  
50  
51  
52  
53  
54  
55

### 56 **Ethics approval and consent to participate**

57  
58 The Institutional Review Board of Xiangya School of Public Health Central South  
59  
60

1  
2  
3  
4 University (No.: XYGW-2019-029) has approved and regulates the ethical execution  
5  
6 of this research.  
7  
8  
9

## 10 11 **Availability of Data and Materials**

12  
13  
14 The datasets used and/or analyzed during the current study are available from the  
15  
16 corresponding author upon reasonable request.  
17  
18  
19

## 20 21 22 **Consent for publication**

23  
24 Not applicable.  
25  
26  
27  
28  
29

## 30 31 **References**

- 32  
33  
34 1. Dr. Benjamin J. Sadock VAS: **Kaplan and Sadock's Synopsis of Psychiatry: Behavioral**  
35  
36 **Sciences/Clinical Psychiatry**: LWW; Eleventh; 2014.  
37  
38  
39 2. Sakakibara E: **What is mental illness?** *BMJ* 2017.  
40  
41  
42 3. Wiersma D, Wanderling J, Dragomirecka E, Ganev K, Harrison G, Der Heiden WA,  
43  
44 Nienhuis FJ, Walsh D: **Social disability in schizophrenia: its development and prediction**  
45  
46 **over 15 years in incidence cohorts in six European centres.** *Psychological Medicine*  
47  
48 2000, **30**(5):1155-1167.  
49  
50  
51 4. Jiang ZN: **Modern Psychiatry**. Beijing: Science Press; 1999.  
52  
53  
54 5. Hsiao C-Y, Tsai Y-F: **Factors of caregiver burden and family functioning among**  
55  
56 **Taiwanese family caregivers living with schizophrenia.** *Journal of clinical nursing* 2015,  
57  
58 **24**(11-12):1546-1556.  
59  
60



- 1  
2  
3  
4 6. Huang Y: **Current situation and challenges of mental health in China.** *China health*  
5  
6 *policy research* 2011, **9**(4):5-9.  
7  
8
- 9 7. Yu Y, Tang B-w, Liu Z-w, Chen Y-m, Zhang X-y, Xiao S: **Who cares for the**  
10  
11 **schizophrenia individuals in rural China — A profile of primary family caregivers.**  
12  
13 *Comprehensive Psychiatry* 2018, **84**:47-53.  
14  
15
- 16 8. Suro G, Mamani WD: **Burden, interdependence, ethnicity, and mental health in**  
17  
18 **caregivers of patients with schizophrenia.** *Family Process* 2013, **52**(2).  
19  
20
- 21 9. Kizilirmak B, Kucuk L: **Care Burden Level and Mental Health Condition of the Families**  
22  
23 **of Individuals With Mental Disorders.** *Archives of Psychiatric Nursing* 2016, **30**(1):47-  
24  
25 54.  
26  
27
- 28 10. Ampalam P, Gunturu S, Padma V: **A comparative study of caregiver burden in**  
29  
30 **psychiatric illness and chronic medical illness.** *Indian journal of psychiatry* 2012,  
31  
32 **54**(3):239-243.  
33  
34  
35
- 36 11. Chen QN, Liu L, Zhang D, Jun LI, Ya-Min LIJJoCP: **Impact of Social Support on**  
37  
38 **Quality of Life and Rehabilitation in Patients with Schizophrenia.** 2016.  
39  
40  
41
- 42 12. Friedmann MS, McDermut WH, Solomon DA, Ryan CE, Keitner GI, Miller IW: **Family**  
43  
44 **Functioning and Mental Illness: A Comparison of Psychiatric and Nonclinical Families.**  
45  
46 *Family Process* 1997, **36**(4):357-367.  
47  
48  
49
- 50 13. Corrigan PW, Morris SB, Michaels PJ, Rafacz JD, Rusch N: **Challenging the Public**  
51  
52 **Stigma of Mental Illness: A Meta-Analysis of Outcome Studies.** *Psychiatr Serv* 2012,  
53  
54 **63**(10):963-973.  
55  
56
- 57 14. Sharac J, Mccrone P, Clement S, Thornicroft GJEEPS: **The economic impact of mental**  
58  
59  
60

- 1  
2  
3  
4 **health stigma and discrimination: a systematic review.** 2010, 19(03):223-232.  
5  
6  
7 15. Weimand BM, Hedelin B, Sllstrm C, Hall-Lord MLJliMHN: **Burden and health in**  
8  
9 **relatives of persons with severe mental illness: a Norwegian cross-sectional study.**  
10  
11 2010, 31(12):804.  
12  
13  
14 16. Liang X, Guo Q, Luo J, Li F, Ding D, Zhao Q, Hong Z: **Anxiety and depression**  
15  
16 **symptoms among caregivers of care-recipients with subjective cognitive decline and**  
17  
18 **cognitive impairment.** *Bmc Neurology* 2016, 16.  
19  
20  
21  
22 17. Heflinger CA, Hinshaw SPJA, Health PiM, Research MHS: **Stigma in Child and**  
23  
24 **Adolescent Mental Health Services Research: Understanding Professional and**  
25  
26 **Institutional Stigmatization of Youth with Mental Health Problems and their Families.**  
27  
28 2010, 37(1-2):p.61-70.  
29  
30  
31  
32 18. Cohen S, Kamarck T, Mermelstein R: **A Global Measure of Perceived Stress.** *Journal*  
33  
34 *of Health and Social Behavior* 1983, 24(4):385.  
35  
36  
37  
38 19. Reis D, Lehr D, Heber E, Ebert DD: **The German Version of the Perceived Stress Scale**  
39  
40 **(PSS-10): Evaluation of Dimensionality, Validity, and Measurement Invariance With**  
41  
42 **Exploratory and Confirmatory Bifactor Modeling.** 2019, 26(7):1246-1259.  
43  
44  
45  
46 20. Cohen S, Williamson GM: **Perceived Stress in a Probability Sample of the United**  
47  
48 **States.** In., edn.; 1988: 31-67.  
49  
50  
51  
52 21. Lee EH: **Review of the Psychometric Evidence of the Perceived Stress Scale.** *Asian*  
53  
54 *Nurs Res* 2012, 6(4):121-127.  
55  
56  
57 22. Nordin M, Nordin S: **Psychometric evaluation and normative data of the Swedish**  
58  
59 **version of the 10-item perceived stress scale.** *Scandinavian Journal of Psychology*  
60

- 1  
2  
3  
4 2013, **54**(6):502-507.  
5  
6  
7 23. Lesage FX, Berjot S, Deschamps F: **PSYCHOMETRIC PROPERTIES OF THE**  
8  
9 **FRENCH VERSIONS OF THE PERCEIVED STRESS SCALE.** *Int J Occup Med*  
10  
11 *Environ Health* 2012, **25**(2):178-184.  
12  
13  
14 24. Kim H-J: **Reliability and Validity of the 4-Item Version of the Korean Perceived Stress**  
15  
16 **Scale.** *Research in Nursing & Health* 2016, **39**(6):472-479.  
17  
18  
19 25. Gonzalez-Ramirez MT, Rodriguez-Ayan MN, Hernandez RL: **The Perceived Stress**  
20  
21 **Scale (PSS): Normative Data and Factor Structure for a Large-Scale Sample in Mexico.**  
22  
23 *Span J Psychol* 2013, **16**:9.  
24  
25  
26  
27 26. Mitchell AM, Crane PA, Kim Y: **Perceived Stress in Survivors of Suicide: Psychometric**  
28  
29 **Properties of the Perceived Stress Scale.** *Research in Nursing & Health* 2008,  
30  
31 **31**(6):576-585.  
32  
33  
34  
35 27. Chaaya M, Osman H, Naassan G, Mahfoud Z: **Validation of the Arabic version of the**  
36  
37 **Cohen perceived stress scale (PSS-10) among pregnant and postpartum women.** *BMC*  
38  
39 *Psychiatry* 2010, **10**:7.  
40  
41  
42  
43 28. Jovanovic V, Gavrilov-Jerkovic V: **More than a (negative) feeling: Validity of the**  
44  
45 **Perceived Stress Scale in Serbian clinical and non-clinical samples.** *Psihologija* 2015,  
46  
47 **48**(1):5-18.  
48  
49  
50  
51 29. Klein EM, Brahler E, Dreier M, Reinecke L, Muller KW, Schmutzer G, Wolfling K, Beutel  
52  
53 **ME: The German version of the Perceived Stress Scale - psychometric characteristics**  
54  
55 **in a representative German community sample.** *Bmc Psychiatry* 2016, **16**:10.  
56  
57  
58  
59 30. Dao-Tran TH, Anderson D, Seib C: **The Vietnamese version of the Perceived Stress**  
60

- 1  
2  
3  
4 **Scale (PSS-10): Translation equivalence and psychometric properties among older**  
5  
6 **women.** *Bmc Psychiatry* 2017, **17**:7.  
7  
8  
9 31. Reis RS, Hino AAF, Rodriguez-Anez CR: **Perceived Stress Scale Reliability and**  
10  
11 **Validity Study in Brazil.** *J Health Psychol* 2010, **15**(1):107-114.  
12  
13  
14 32. Wongpakaran N, Wongpakaran T: **The Thai version of the PSS-10: An Investigation of**  
15  
16 **its psychometric properties.** *BioPsychoSocial medicine* 2010, **4**:6.  
17  
18  
19 33. Yang TZ, Huang HT: **[An epidemiological study on stress among urban residents in**  
20  
21 **social transition period].** *Chinese Journal of Epidemiology* 2003, **24**(9):760.  
22  
23  
24 34. Wang Z, Chen J, Boyd JE, Zhang HY, Jia XZ, Qiu JY, Xiao ZP: **Psychometric**  
25  
26 **Properties of the Chinese Version of the Perceived Stress Scale in Policewomen.** *PLoS*  
27  
28 *One* 2011, **6**(12):4.  
29  
30  
31  
32 35. Lu W, Bian Q, Wang W, Wu X, Wang Z, Zhao M: **Chinese version of the Perceived**  
33  
34 **Stress Scale-10: A psychometric study in Chinese university students.** *PLoS One* 2017,  
35  
36 **12**(12):e0189543.  
37  
38  
39  
40 36. Ng S-M: **Validation of the 10-item Chinese perceived stress scale in elderly service**  
41  
42 **workers: one-factor versus two-factor structure.** *BMC psychology* 2013, **1**(1):9.  
43  
44  
45 37. Leung DYP, Lam TH, Chan SSC: **Three versions of Perceived Stress Scale: validation**  
46  
47 **in a sample of Chinese cardiac patients who smoke.** *BMC Public Health* 2010, **10**:7.  
48  
49  
50 38. Lee B, Jeong HI: **Construct validity of the perceived stress scale (PSS-10) in a sample**  
51  
52 **of early childhood teacher candidates.** *Psychiatry & Clinical Psychopharmacology* 2019,  
53  
54 **29**(1):76-82.  
55  
56  
57  
58 39. Almadi T, Cathers I, Mansour AMH, Chow CM: **An Arabic version of the Perceived**  
59  
60

- 1  
2  
3  
4 **Stress Scale: Translation and validation study.** *International Journal of Nursing Studies*  
5  
6  
7 2012, **49**(1):84-89.  
8
- 9 40. Michaelides MP, Christodoulou A, Kkeli N, Karekla M, Panayiotou G: **Factorial structure**  
10  
11 **of the perceived stress scale and implications for scoring.** *European Review of Applied*  
12  
13 *Psychology* 2016:309-316.  
14
- 15 41. Bradbury J: **Modelling Stress Constructs with Biomarkers: The Importance of the**  
16  
17 **Measurement Model.** *clinical & experimental medical sciences* 2013.  
18  
19
- 20 42. Pangtey R, Basu S, Meena GS, Banerjee B: **Perceived Stress and its Epidemiological**  
21  
22 **and Behavioral Correlates in an Urban Area of Delhi, India: A Community-Based Cross-**  
23  
24 **Sectional Study.** *Indian Journal of Psychological Medicine* 2020, **42**(1):80-86.  
25  
26  
27
- 28 43. Yu Y, Li T-X, Xi S-J, Li Y-L, Xiao X, Yang M, Ge X, Xiao S, Tebes J: **Assessing a**  
29  
30 **WeChat-based integrative family intervention (WIFI) for schizophrenia: protocol for a**  
31  
32 **stepped-wedge cluster randomized trial (Preprint).** *JMIR Research Protocols* 2020.  
33  
34  
35
- 36 44. Ma H: **Integration of hospital and community services-the '686 Project'-is a crucial**  
37  
38 **component in the reform of China's mental health services.** *Shanghai archives of*  
39  
40 *psychiatry* 2012, **24**(3):172-174.  
41  
42  
43
- 44 45. Mokkink LB, De Vet HCW, Prinsen CAC, Patrick DL, Alonso J, Bouter LM, Terwee  
45  
46 **CBJQoLR: COSMIN Risk of Bias checklist for systematic reviews of Patient-Reported**  
47  
48 **Outcome Measures.** 2017.  
49  
50
- 51 46. Eklund M, Backstrom M, Tuveesson H: **Psychometric properties and factor structure of**  
52  
53 **the Swedish version of the Perceived Stress Scale.** *Nord J Psychiatr* 2014, **68**(7):494-  
54  
55  
56  
57  
58  
59  
60 499.

- 1  
2  
3  
4 47. Alharbi H, Alshehry A: **Perceived stress and coping strategies among ICU nurses in**  
5  
6 **government tertiary hospitals in Saudi Arabia: a cross-sectional study.** *Ann Saudi Med*  
7  
8  
9 2019, **39**(1):48-55.  
10  
11  
12 48. Link BG, Cullen FT, Frank J, Wozniak JF: **The Social Rejection of Former Mental**  
13  
14 **Patients: Understanding Why Labels Matter.** *American Journal of Sociology* 1987,  
15  
16 **92**(6):1461-1500.  
17  
18  
19 49. Link BG, Struening EL, Neese-Todd S, Asmussen S, Phelan JC: **Stigma as a Barrier**  
20  
21 **to Recovery: The Consequences of Stigma for the Self-Esteem of People With Mental**  
22  
23 **Illnesses.** *Psychiatr Serv* 2001, **52**(12):1621-1626.  
24  
25  
26  
27 50. Perlick DA, Rosenheck RA, Clarkin JF, Sirey JA, Salahi J, Struening EL, Link BG:  
28  
29 **Stigma as a Barrier to Recovery: Adverse Effects of Perceived Stigma on Social**  
30  
31 **Adaptation of Persons Diagnosed With Bipolar Affective Disorder.** *Psychiatr Serv* 2001,  
32  
33 **52**(12):1627-1632.  
34  
35  
36  
37 51. China NHCotpsRo: **Documents of the General Office of the Ministry of Health. Notice**  
38  
39 **of the General Office of the Ministry of Health of the People's Republic of China on the**  
40  
41 **printing and distribution of the investigation and evaluation program on mental health**  
42  
43 **indicators.** In.; 2010.  
44  
45  
46  
47  
48 52. Li J, Fan Y, Zhong HQ, Duan XL, Chen W, Evans-Lacko S, Thornicroft G: **Effectiveness**  
49  
50 **of an anti-stigma training on improving attitudes and decreasing discrimination towards**  
51  
52 **people with mental disorders among care assistant workers in Guangzhou, China.** *Int*  
53  
54 *J Ment Health Syst* 2019, **13**:10.  
55  
56  
57  
58 53. Spitzer RL, Kroenke K, Williams JBW, Patient Hlth Questionnaire P: **Validation and**  
59  
60

- 1  
2  
3  
4 utility of a self-report version of PRIME-MD - The PHQ primary care study. *JAMA-J Am*  
5  
6 *Med Assoc* 1999, **282**(18):1737-1744.  
7  
8  
9 54. Yeung A, Fung F, Yu SC, Vorono S, Ly M, Wu S, Fava M: **Validation of the Patient**  
10 **Health Questionnaire-9 for depression screening among chinese Americans.**  
11  
12 *Comprehensive Psychiatry* 2008, **49**(2):211-217.  
13  
14  
15 55. Spitzer RL, Kroenke K, Williams JBW, Lowe B: **A brief measure for assessing**  
16 **generalized anxiety disorder - The GAD-7.** *Arch Intern Med* 2006, **166**(10):1092-1097.  
17  
18  
19 56. Schalet BD, Cook KF, Choi SW, Cella D: **Establishing a common metric for self-**  
20 **reported anxiety: Linking the MASQ, PANAS, and GAD-7 to PROMIS Anxiety.** *J*  
21 *Anxiety Disord* 2014, **28**(1):88-96.  
22  
23  
24 57. He XY, Li CB, Qian J, Cui HS, Wu WYJSAoP: **Reliability and validity of a generalized**  
25 **anxiety disorder scale in general hospital outpatients.** 2010, **22**(4):200-203.  
26  
27  
28 58. Huang YX, Luo D, Chen X, Zhang DX, Wang M, Qiu YY, Liu Y, Peng BH, Niu L, Xiao  
29 **SY: Changes and determinants of health-related quality of life among people newly**  
30 **diagnosed with HIV in China: a 1-year follow-up study.** *Qual Life Res* 2019, **28**(1):35-  
31 46.  
32  
33  
34 59. Zimet GD, Dahlem NW, Zimet SG, Farley GK: **The Multidimensional Scale of Perceived**  
35 **Social Support.** *Journal of Personality Assessment* 1988, **52**(1):30-41.  
36  
37  
38 60. Zimet GD, Powell SS, Farley GK, Werkman S, Berkoff KAJJ: **Psychometric**  
39 **characteristics of the Multidimensional Scale of Perceived Social Support.** 1990, **55**(3-  
40 4):610-617.  
41  
42  
43  
44 61. Huang L, Jiang QJ, Ren WH: **Coping style, social support, and psychosomatic**  
45  
46  
47  
48  
49  
50  
51  
52  
53  
54  
55  
56  
57  
58  
59  
60

- 1  
2  
3  
4 symptoms in patients with cancer. *Chinese Mental Health Journal* 1996, 10:160-161.  
5  
6  
7 62. Smilkstein G: **The family APGAR: a proposal for a family function test and its use by**  
8  
9 **physicians.** *The Journal of family practice* 1978, 6(6):1231-1239.  
10  
11  
12 63. Wang MW, Huang YY: **Evaluating family function in caring for a geriatric group: Family**  
13  
14 **APGAR applied for older adults by home care nurses.** *Geriatr Gerontol Int* 2016,  
15  
16 **16(6):716-721.**  
17  
18  
19 64. Lim ATC, Manching J, Penserga EG: **Correlation between Family APGAR scores and**  
20  
21 **health-related quality of life of Filipino elderly patients with knee osteoarthritis.** *Int J*  
22  
23 *Rheum Dis* 2012, 15(4):407-413.  
24  
25  
26  
27 65. Saameño JAB, Sánchez AD, Castillo JDLD, Claret PL: **[Validity and reliability of the**  
28  
29 **family Apgar family function test].** *Atencion Primaria* 1996, 18(6):289.  
30  
31  
32 66. Yu Y: **Study on family burden and experiences of primary caregivers of schizophrenia**  
33  
34 **in community.** Central South University, N1 - 2020-07-22 15:50:00; 2016.  
35  
36  
37  
38 67. Tong X LT, Xi S, Yu Y.: **Validating a Caregiving Rewarding Feelings scale among family**  
39  
40 **caregivers of those diagnosed with schizophrenia in China.** . *Journal of Psychiatric and*  
41  
42 *Mental Health Nursing.*  
43  
44  
45 68. Hair JF BW, Babin BYJ, Anderson RE.: **Multivariate data analysis. 8th ed.** : Andover,  
46  
47 Hampshire: Cengage; 2019.  
48  
49  
50 69. Gabe KT, Jaime PC: **Development and testing of a scale to evaluate diet according to**  
51  
52 **the recommendations of the Dietary Guidelines for the Brazilian Population.** *Public*  
53  
54 *Health Nutrition* 2019, 22(5):785-796.  
55  
56  
57  
58 70. Hu L-t, Bentler PM: **Cutoff criteria for fit indexes in covariance structure analysis:**  
59  
60



- 1  
2  
3  
4 **Conventional criteria versus new alternatives.** *Structural Equation Modeling: A*  
5  
6 *Multidisciplinary Journal* 1999, 6(1).  
7  
8  
9 71. Byrne BM: **Structural Equation Modeling With AMOS, EQS, and LISREL: Comparative**  
10  
11 **Approaches to Testing for the Factorial Validity of a Measuring Instrument.** *International*  
12 *journal of testing* 2001, 1(1):55-86.  
13  
14  
15  
16  
17 72. Kline R, Kline RB, Kline R: **Principles and Practice of Structural Equation Modeling.**  
18 *Journal of the American Statistical Association* 2011, 101(12).  
19  
20  
21  
22 73. Hair JF, Black WC, Babin BJ, Anderson RE: **Multivariate Data Analysis: A Global**  
23 **Perspective 7th ed.** : Upper Saddle River, NJ: Pearson/Prentice Hall.; 2010.  
24  
25  
26  
27 74. Nunnally JC: **Psychometric theory.** *American Educational Research Journal* 1978,  
28 5(3):83.  
29  
30  
31  
32  
33 75. Marx RG, Menezes A, Horovitz L, Jones EC, Warren RF: **A comparison of two time**  
34 **intervals for test-retest reliability of health status instruments.** *Journal of Clinical*  
35 *Epidemiology* 2003, 56(8):730-735.  
36  
37  
38  
39  
40 76. Fayers PM, Machin D: **Quality of Life: The Assessment, Analysis and Interpretation of**  
41 **Patient-Reported Outcomes: Second Edition.** 2007.  
42  
43  
44  
45 77. Öruc MÇ, Demir A: **Psychometric evaluation of perceived stress scale for Turkish**  
46 **university students.** *Stress & Health* 2010, 25(1):103-109.  
47  
48  
49  
50 78. Siqueira Reis R, Ferreira Hino AA, Romélio Rodriguez Añez C: **Perceived Stress Scale.**  
51 *J Health Psychol* 2010, 15(1):107-114.  
52  
53  
54  
55 79. Taylor JM: **Psychometric analysis of the Ten-Item Perceived Stress Scale.**  
56 *Psychological assessment* 2015, 27(1):90-101.  
57  
58  
59  
60

- 1  
2  
3  
4 80. Baik SH, Fox RS, Mills SD, Roesch SC, Sadler GR, Klonoff EA, Malcarne VL: **Reliability**  
5  
6 **and validity of the Perceived Stress Scale-10 in Hispanic Americans with English or**  
7  
8 **Spanish language preference.** *J Health Psychol* 2019, **24**(5):628-639.
- 9  
10  
11 81. Golden-Kreutz DM, Browne MW, Frierson GM, Andersen BL: **Cutoff criteria for fit**  
12  
13 **indexes in covariance str stress scale.** *Assessment* 2004, **11**(3):216-223.
- 14  
15  
16 82. Ezzati A, Jiang J, Katz MJ, Sliwinski MJ, Zimmerman ME, Lipton RB: **Validation of the**  
17  
18 **Perceived Stress Scale in a community sample of older adults.** *International Journal of*  
19  
20 *Geriatric Psychiatry* 2014, **29**(6):645-652.
- 21  
22  
23 83. Mimura C, Griffiths P: **A Japanese version of the Perceived Stress Scale: cross-cultural**  
24  
25 **translation and equivalence assessment.** *BMC Psychiatry*, **8**, 1(2008-09-30) 2008, **8**.
- 26  
27  
28 84. Lee EH, Chung BY, Suh CH, Jung JY: **Korean versions of the Perceived Stress Scale**  
29  
30 **(PSS-14, 10 and 4): psychometric evaluation in patients with chronic disease.** *Scand J*  
31  
32 *Caring Sci* 2015, **29**(1):183-192.
- 33  
34  
35 85. Ingram PB, Clarke E, Lichtenberg JW: **Confirmatory Factor Analysis of the Perceived**  
36  
37 **Stress Scale-4 in a Community Sample.** *Stress and health* 2016, **32**(2):173-176.
- 38  
39  
40  
41  
42  
43  
44  
45  
46  
47  
48  
49  
50  
51  
52  
53  
54  
55  
56  
57  
58  
59  
60

**Table 1. Demographic characteristics of the participants (N = 449)**

| <b>characteristics</b> | <b>M(sd)/N(%)</b>                 | <b>N=449</b> |
|------------------------|-----------------------------------|--------------|
| Age(years)             | 18-59                             | 169(37.6)    |
|                        | 60-100                            | 280(62.4)    |
|                        | Mcan(SD)                          | 60.90(12.28) |
| Gender                 | Male                              | 206(45.9)    |
|                        | Female                            | 243(54.1)    |
| Occupation             | Employed                          | 65(14.4)     |
|                        | Not Employed                      | 384(85.6)    |
| Education              | Primary and below                 | 130(29.0)    |
|                        | Middle and high                   | 276(61.5)    |
|                        | College and above                 | 43(9.5)      |
| Marital Status         | Single                            | 19(4.2)      |
|                        | Married/cohabited                 | 340(75.7)    |
|                        | Else(divorced/separated/windowed) | 90(20.0)     |
| Kinship                | Parents                           | 254(56.57)   |
|                        | Spouse                            | 106(23.61)   |
|                        | Children                          | 29(6.46)     |
|                        | Siblings                          | 49(10.91)    |
|                        | Other                             | 11(2.45)     |
| Income(RMB/year)       | 20000 or less                     | 254(56.6)    |
|                        | 20001-40000                       | 99(22.0)     |
|                        | 40000 or geater                   | 96(21.4)     |

**Table 2. Exploratory factor analysis of the PSS-10 (N=218)**

| Short item names         | Mean (SD)   | Components of the factors |                    | Uniqueness | SRW  |
|--------------------------|-------------|---------------------------|--------------------|------------|------|
|                          |             | Perceived helplessness    | Perceived efficacy |            |      |
| 3. Nervous and stressed  | 2.02 (1.15) | 0.82                      |                    | 0.22       | 0.83 |
| 2. Unable to control     | 1.80 (1.20) | 0.78                      |                    | 0.24       | 0.78 |
| 1. Been upset            | 1.75 (1.09) | 0.77                      |                    | 0.21       | 0.85 |
| 10. Could not overcome   | 1.80 (1.20) | 0.75                      |                    | 0.13       | 0.90 |
| 6. Could not cope        | 1.78 (1.09) | 0.71                      |                    | 0.22       | 0.83 |
| 9. Been angered          | 1.74 (1.24) | 0.70                      |                    | 0.14       | 0.84 |
| 8. On top of things      | 1.91 (1.18) |                           | 0.78               | 0.25       | 0.91 |
| 7. Control irritations   | 1.74 (1.11) |                           | 0.66               | 0.24       | 0.84 |
| 5. Going your way        | 2.30 (1.17) |                           | 0.63               | 0.32       | 0.85 |
| 4. Felt confident        | 1.68 (1.23) |                           | 0.60               | 0.32       | 0.92 |
| Eigenvalue               |             | 3.48                      | 1.80               |            |      |
| Variance (Total = 89.5%) |             | 65.6%                     | 23.9%              |            |      |
| Inter-factor correlation |             |                           | 0.60               |            |      |

SRW: standard regression weight

**Table 3. Correlations between PSS-10 factors, Composite Reliability (CR), and Average Variance Extracted (AVE) (N=218)**

| <b>Factors</b>            | <b>1</b> | <b>2</b> |
|---------------------------|----------|----------|
| 1. Perceived helplessness | 1        |          |
| 2. Perceived efficacy     | 0.60     | 1        |
| AVE                       | 0.79     | 0.81     |
| CR                        | 0.94     | 0.88     |

CR: Composite reliability, AVE: Average variance extracted

**Table 4 Correlations of PSS-10 and its two subscales with other variables (N=449)**

| Variables                      | 1       | 2       | 3       | 4       | 5       | 6       | 7      | 8      | 9    |
|--------------------------------|---------|---------|---------|---------|---------|---------|--------|--------|------|
| 1. PSS-10                      | 1.00    |         |         |         |         |         |        |        |      |
| 2. Perceived helplessness -sub | 0.88**  | 1.00    |         |         |         |         |        |        |      |
| 3. Perceived efficacy -sub     | 0.51**  | 0.09    | 1.00    |         |         |         |        |        |      |
| 4.PDD                          | 0.16**  | 0.14**  | 0.07    | 1.00    |         |         |        |        |      |
| 5. PHQ-9                       | 0.54**  | 0.54**  | 0.17**  | -0.02   | 1.00    |         |        |        |      |
| 6. GAD-7                       | 0.62**  | 0.65**  | 0.14**  | 0.01    | 0.72**  | 1.00    |        |        |      |
| 7.MSPSS-12                     | -0.22** | -0.13** | -0.24** | -0.31** | -0.11*  | -0.09   | 1.00   |        |      |
| 8.APGAR-5                      | -0.30** | -0.19** | -0.35** | -0.27** | -0.18** | -0.17** | 0.56** | 1.00   |      |
| 9.CRF-12                       | -0.33** | -0.15** | -0.45** | -0.27** | -0.12** | -0.08   | 0.54** | 0.66** | 1.00 |

&Spearman correlation using pairwise deletion for missing values \*P< 0.05, \*\* P<0.01

PSS: Perceived stress scale; PDD: Perceived Devaluation and Discrimination Scale; PHQ-9: Patient health questionnaire-9; GAD-7: Generalized anxiety disorder scale-7; MSPSS: Multidimensional scale of perceived social support; APGAR: Family adaptation, partnership, growth, affection, and resolve index scale; CRF: Caregiving rewarding feelings

**FIGURE 1 | Standardized factor loadings for the two-factor model of the Perceived Stress Scale (PSS-10) (N=218) . F1: perceived stress; F2: perceived efficacy; pss: perceived stress scale.**

For peer review only

1  
2  
3  
4  
5  
6  
7  
8  
9  
10  
11  
12  
13  
14  
15  
16  
17  
18  
19  
20  
21  
22  
23  
24  
25  
26  
27  
28  
29  
30  
31  
32  
33  
34  
35  
36  
37  
38  
39  
40  
41  
42  
43  
44  
45  
46  
47  
48  
49  
50  
51  
52  
53  
54  
55  
56  
57  
58  
59  
60

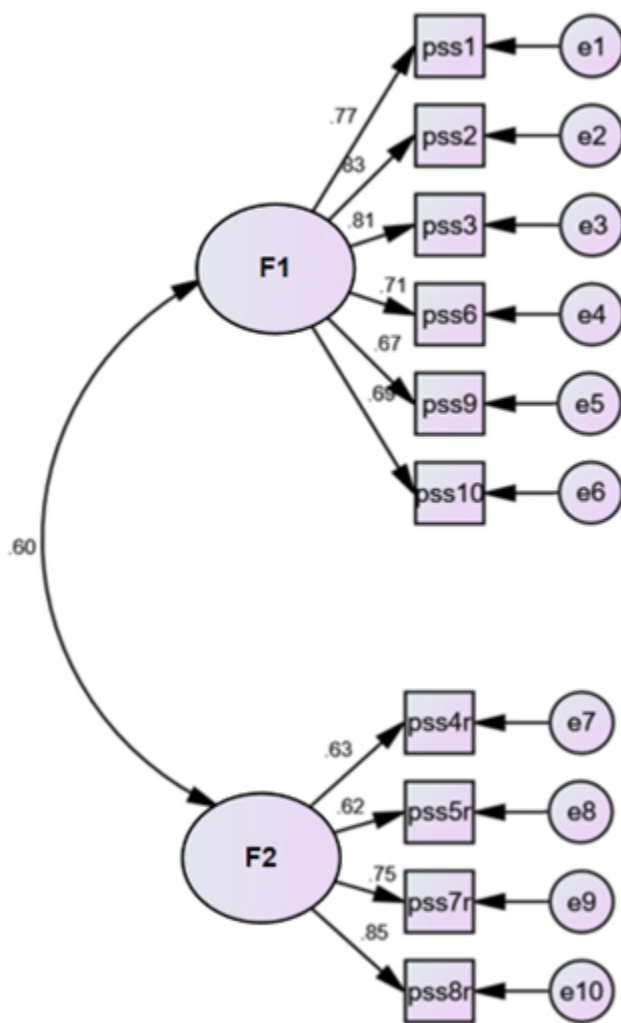

FIGURE 1 | Standardized factor loadings for the two-factor model of the Perceived Stress Scale (PSS-10) (N=218) . F1: perceived stress; F2: perceived efficacy; pss: perceived stress scale.

117x146mm (96 x 96 DPI)



1  
2  
3  
4  
5  
6  
7  
8  
9  
10  
11  
12  
13  
14  
15  
16  
17  
18  
19  
20  
21  
22  
23  
24  
25  
26  
27  
28  
29  
30  
31  
32  
33  
34  
35  
36  
37  
38  
39  
40  
41  
42  
43  
44  
45  
46  
47  
48  
49  
50  
51  
52  
53  
54  
55  
56  
57  
58  
59  
60STROBE Statement—Checklist of items that should be included in reports of *cross-sectional studies*

|                              | Item No                                                                            | Recommendation                                                                                                                                                                                    | Page No |
|------------------------------|------------------------------------------------------------------------------------|---------------------------------------------------------------------------------------------------------------------------------------------------------------------------------------------------|---------|
| <b>Title and abstract</b>    | 1                                                                                  | (a) Indicate the study's design with a commonly used term in the title or the abstract                                                                                                            | 1-3     |
|                              |                                                                                    | (b) Provide in the abstract an informative and balanced summary of what was done and what was found                                                                                               | 3-5     |
| <b>Introduction</b>          |                                                                                    |                                                                                                                                                                                                   |         |
| Background/rationale         | 2                                                                                  | Explain the scientific background and rationale for the investigation being reported                                                                                                              | 6-8     |
| Objectives                   | 3                                                                                  | State specific objectives, including any prespecified hypotheses                                                                                                                                  | 7       |
| <b>Methods</b>               |                                                                                    |                                                                                                                                                                                                   |         |
| Study design                 | 4                                                                                  | Present key elements of study design early in the paper                                                                                                                                           | 8       |
| Setting                      | 5                                                                                  | Describe the setting, locations, and relevant dates, including periods of recruitment, exposure, follow-up, and data collection                                                                   | 8-9     |
| Participants                 | 6                                                                                  | (a) Give the eligibility criteria, and the sources and methods of selection of participants                                                                                                       | 8-9     |
| Variables                    | 7                                                                                  | Clearly define all outcomes, exposures, predictors, potential confounders, and effect modifiers. Give diagnostic criteria, if applicable                                                          | 8-9     |
| Data sources/<br>measurement | 8*                                                                                 | For each variable of interest, give sources of data and details of methods of assessment (measurement). Describe comparability of assessment methods if there is more than one group              | 9-13    |
| Bias                         | 9                                                                                  | Describe any efforts to address potential sources of bias                                                                                                                                         | NA      |
| Study size                   | 10                                                                                 | Explain how the study size was arrived at                                                                                                                                                         | 8-9     |
| Quantitative variables       | 11                                                                                 | Explain how quantitative variables were handled in the analyses. If applicable, describe which groupings were chosen and why                                                                      | 13      |
| Statistical methods          | 12                                                                                 | (a) Describe all statistical methods, including those used to control for confounding                                                                                                             | 13-14   |
|                              |                                                                                    | (b) Describe any methods used to examine subgroups and interactions                                                                                                                               | 13-14   |
|                              | (c) Explain how missing data were addressed                                        | NA                                                                                                                                                                                                |         |
|                              | (d) If applicable, describe analytical methods taking account of sampling strategy | NA                                                                                                                                                                                                |         |
|                              | (e) Describe any sensitivity analyses                                              | 13-14                                                                                                                                                                                             |         |
| <b>Results</b>               |                                                                                    |                                                                                                                                                                                                   |         |
| Participants                 | 13*                                                                                | (a) Report numbers of individuals at each stage of study—eg numbers potentially eligible, examined for eligibility, confirmed eligible, included in the study, completing follow-up, and analysed | 14      |
|                              |                                                                                    | (b) Give reasons for non-participation at each stage                                                                                                                                              | NA      |
|                              |                                                                                    | (c) Consider use of a flow diagram                                                                                                                                                                | NA      |
| Descriptive data             | 14*                                                                                | (a) Give characteristics of study participants (eg demographic, clinical, social) and information on exposures and potential confounders                                                          | 14      |
|                              |                                                                                    | (b) Indicate number of participants with missing data for each variable of interest                                                                                                               | NA      |
| Outcome data                 | 15*                                                                                | Report numbers of outcome events or summary measures                                                                                                                                              | 14-15   |

|                                                                                                                                                                            |                          |    |                                                                                                                                                                                                              |       |
|----------------------------------------------------------------------------------------------------------------------------------------------------------------------------|--------------------------|----|--------------------------------------------------------------------------------------------------------------------------------------------------------------------------------------------------------------|-------|
| 1<br>2<br>3<br>4<br>5<br>6<br>7<br>8<br>9<br>10                                                                                                                            | Main results             | 16 | (a) Give unadjusted estimates and, if applicable, confounder-adjusted estimates and their precision (eg, 95% confidence interval). Make clear which confounders were adjusted for and why they were included | NA    |
| 11<br>12<br>13                                                                                                                                                             |                          |    | (b) Report category boundaries when continuous variables were categorized                                                                                                                                    | 14-15 |
| 14                                                                                                                                                                         |                          |    | (c) If relevant, consider translating estimates of relative risk into absolute risk for a meaningful time period                                                                                             | NA    |
| 15<br>16<br>17<br>18<br>19                                                                                                                                                 | Other analyses           | 17 | Report other analyses done—eg analyses of subgroups and interactions, and sensitivity analyses                                                                                                               | 14-15 |
| 20<br>21<br>22<br>23                                                                                                                                                       | <b>Discussion</b>        |    |                                                                                                                                                                                                              |       |
| 24<br>25<br>26                                                                                                                                                             | Key results              | 18 | Summarise key results with reference to study objectives                                                                                                                                                     | 18    |
| 27<br>28<br>29<br>30<br>31                                                                                                                                                 | Limitations              | 19 | Discuss limitations of the study, taking into account sources of potential bias or imprecision. Discuss both direction and magnitude of any potential bias                                                   | 17-18 |
| 32<br>33<br>34<br>35<br>36<br>37<br>38<br>39<br>40<br>41<br>42<br>43<br>44<br>45<br>46<br>47<br>48<br>49<br>50<br>51<br>52<br>53<br>54<br>55<br>56<br>57<br>58<br>59<br>60 | Interpretation           | 20 | Give a cautious overall interpretation of results considering objectives, limitations, multiplicity of analyses, results from similar studies, and other relevant evidence                                   | 15-18 |
|                                                                                                                                                                            | Generalisability         | 21 | Discuss the generalisability (external validity) of the study results                                                                                                                                        | 16-18 |
|                                                                                                                                                                            | <b>Other information</b> |    |                                                                                                                                                                                                              |       |
|                                                                                                                                                                            | Funding                  | 22 | Give the source of funding and the role of the funders for the present study and, if applicable, for the original study on which the present article is based                                                | 19    |

\*Give information separately for exposed and unexposed groups.

**Note:** An Explanation and Elaboration article discusses each checklist item and gives methodological background and published examples of transparent reporting. The STROBE checklist is best used in conjunction with this article (freely available on the Web sites of PLoS Medicine at <http://www.plosmedicine.org/>, Annals of Internal Medicine at <http://www.annals.org/>, and Epidemiology at <http://www.epidem.com/>). Information on the STROBE Initiative is available at [www.strobe-statement.org](http://www.strobe-statement.org).
